# Supplementary material for: Report about term infants with severe hyperbilirubinemia undergoing exchange transfusion in Southwestern China during an 11-year period, from 2001 to 2011
Source: PLoS One. 2017 Jun 29;12(6):e0179550. doi: 10.1371/journal.pone.0179550 (PMC5491324; doi:10.1371/journal.pone.0179550)
Supplement: S2 File — (XLSX) [file pone.0179550.s002.xlsx]

## Sheet: 总计
Year	Number	Time in hospital(d)	Discharge status (cure+better 1;worsen+death 2)	ABO hemolysis 1Yes 2No	Rh hemolysis 1Yes2No	G6PDD 1Yes2No	Unidentified cause 1Yes2No	Metabolic acidosis after ECT 1Yes2No	Hyperglycemia after ECT 1Yes2No	Hypokalemia after ECT 1Yes2No	Hyponatremia after ECT 1Yes2No	Hypocalcemia after ECT 1Yes2No	ECT-associated Apnea 1Yes2No	ECT-associated respiratory failure 1Yes 2No	ECT-associated heart failure 1Yes2No	Gestational Age	Delivery mode 1.Caesarean2.natural	Onset time of jaundice	ABE score	ABE 0 no 1 mild 2 moderate 3 severe	Time of ECT	Discharge status (cure+better 1;worsen+death)	Volume exchange out（ml)	Volume exchange in（ml）	Duration of ECT（min）	TSBpre-ECT (μmol/L)	TSBpre-ECT (μmol/L)/ 8.5（mg/dl）	ALB pre-ECT	B/A	PLT＜100	PLT＜50	TSBpost-ECT (μmol/L)	BAEP 1normal 2abnormal 3 absent	NBNA abnormal 1Yes2No	Duration of phototherapy	ECT-associated Apnea 1Yes2No	ECT-associated respiratory failure 1Yes 2No	ECT-associated heart failure 1Yes2No	Volume exchange out(ml/kg)	Volume exchange out(ml/kg)	Weight loss rate
1	1	12	1	2	2	2	1	1	2	2	2	2	2	2	2	40	2	40	0	0	1	1	490	550	90	367.7	2.52976		#DIV/0!	1	2	276.4	1		142	2	2	2	199.593	224.033	-0.123214
1	2	9	1	1	2	2	2	2	2	1	2	2	2	2	2	41	2	23	2，0，0	1	1	1	520	600	137	337	2.31854		#DIV/0!	1	2	242.9	1		65	2	2	2	138.667	160	0
1	3	18	1	1	2	2	2	2	2	1	1	2	2	2	2	37.286	1	10	0	0	1	1	520	520	150	195.1	1.34228		#DIV/0!				1		29	2	2	2	189.091	189.091	-0.0178571
1	4	9	1	1	2	2	2	2	2	1	2	1	2	2	2	41	2	23	1	1	1	1	550	550	132	240.7	1.656		#DIV/0!	1	2		3		23	2	2	2	207.547	207.547	-0.0363636
1	5	6	1	1	2	2	2	2	2	1	1	1	2	2	2	40.429	1	8	0	0	1	1	600	600	160	386.7	2.66047		#DIV/0!	2	2	227.7	1		90	2	2	2	187.5	187.5	0.015873
1	6	6	1	1	2	2	2	2	2	2	2	2	2	2	2	41.856	1	15	2	1	1	1	600	600	120	362.3	2.4926		#DIV/0!	2	2	253.9	3		113	2	2	2	187.5	187.5	-0.0857143
1	7	7	1	1	2	2	2	2	2	1	2	2	2	2	2	37	2	24	0	0	1	1	500	500	120	330.5	2.27382		#DIV/0!			216.5			36	2	2	2	193.798	193.798	0.032
1	8	15	1	2	2	1	2	2	1	1	2	2	2	2	2	37	2	72	2，3，3	3	1	1	500	500	85	453.3	3.11868		#DIV/0!			219.7	2		72	2	2	2	185.185	185.185	0
1	9	9	1	1	2	2	2	1	2	2	2	2	2	1	1	39.571	1	43	1	1	1	1	520	600	110	473.6	3.25834		#DIV/0!	2	2	219.6	3		67	2	1	1	185.714	214.286	-0.111111
1	10	7	1	1	2	2	2	1	1	2	2	2	2	2	2	37.714	1	48	2，0，0	1	1	1	670	700	170	431.6	2.96938		#DIV/0!				1		43	2	2	2	186.111	194.444	-0.0769231
1	11	3	2	1	2	2	2	1	2	2	2	2	2	2	2	39	2	30	1	1	1	2	570	600	83	308.4	2.12178		#DIV/0!	2	2		2		40	2	2	2	182.109	191.693	-0.105714
1	12	9	1	1	2	2	2	2	2	2	2	2	2	2	2	37.429	1	72	0	0	1	1	590	600	100	371.8	2.55796		#DIV/0!			196.4	1		58	2	2	2	207.018	210.526	-0.103774
1	13	3	1	1	2	2	2	2	1	1	2	2	2	2	2	40	1	12	1	1	1	1	600	600	105	381.7	2.62607		#DIV/0!	1	2	202.6	2		60	2	2	2	206.897	206.897	-0.0333333
1	14	4	1	1	2	2	2	2	1	2	2	1	2	2	2	39.286	2	22	0	0	1	1	590	600	123	365.1	2.51187		#DIV/0!			276.1	1		90	2	2	2	216.912	220.588	-0.0933333
1	15	6	1	2	2	1	2	2	1	2	2	2	2	2	1	38.286	1	72	3，2，3	3	1	1	300	300	90	449.3	3.09116		#DIV/0!			418.3	2		68	2	2	1	180.832	180.832	-0.0783333
1	16	9	2	1	2	2	2	2	2	1	2	1	2	1	1	37	2	64	2，2，0	2	3	2	500	500	130	369.4	2.54145		#DIV/0!			362.3	2	2	159	2	1	1	154.321	154.321	-0.1
1	17	12	1	2	2	2	2	2	1	2	2	2	2	1	1	38	2	24	3，3，3	3	2	1	600	600	128	766.3	5.2721		#DIV/0!				2		106	2	1	1	220.588	220.588	-0.122581
2	1	5	1	1	2	2	2	2	1	1	2	2	2	2	2	41	1	20	2，0，2	2	1	1	500	500	63	364.8	2.5098		#DIV/0!	2	2				44	2	2	2	179.856	179.856	-0.103226
2	2	10	1	1	2	2	2	1	1	1	2	2	2	2	2	40.286	1	35	0	0	1	1	575	575	116	217.3	1.49501		#DIV/0!	2	2			1	52	2	2	2	195.578	195.578	-0.0084317
2	3	11	1	1	2	2	2	1	1	1	2	1	2	2	2	40	1	30	0	0	1	1	500	500	126	351.5	2.4183		#DIV/0!			235.7	1		82	2	2	2	161.29	161.29	-0.0882353
2	4	7	1	1	2	2	2	2	2	1	2	2	2	2	2	38	1	24	2，2，0	2	1	1	500	500	125	473.9	3.26041		#DIV/0!			243.6	2		138	2	2	2	153.846	153.846	-0.0714286
2	5	7	1	1	2	2	2	1	2	1	2	2	2	2	2	40	2	36	4	2	1	1	500	500	90	421.3	2.89852		#DIV/0!	2	2		1		69	2	2	2	134.048	134.048	-0.101205
2	6	5	1	1	2	2	2	2	1	1	2	2	2	2	2	38.286	1	32	0	0	1	1	495	500	80	355.2	2.44376		#DIV/0!	2	2				45	2	2	2	151.376	152.905	-0.0521739
2	7	1	2	2	2	2	1	2	1	1	2	2	2	1	2	38.856	2	24	3，3，3	3	1	2	450	450	95	684.5	4.70932		#DIV/0!						18	2	1	2	161.871	161.871	-0.144615
2	8	8	1	1	2	2	2	1	1	1	2	2	2	2	2	39.714	2	27	2	1	1	1	450	450	124	306.6	2.10939		#DIV/0!	1	2	234	1		77	2	2	2	141.956	141.956	-0.0676471
2	9	12	1	2	2	1	2	1	2	1	2	2	2	2	2	40.714	1	14	2	1	1	1	550	550	102	169.2	1.16409		#DIV/0!	2	2				47	2	2	2	171.875	171.875	-0.030303
2	10	11	1	1	2	2	2	2	1	2	2	2	2	2	2	38.571	2	48	2，2，0	2	1	1	450	450	144	359.6	2.47403		#DIV/0!	2	2		1	2	50	2	2	2	170.455	170.455	-0.0571429
2	11	1	2	2	2	2	2	2	1	2	2	2	2	2	2	40	2	72	2，3，3	3	1	2	500	500	129	927.9	6.3839		#DIV/0!	2	2	517.2			27	2	2	2	157.233	157.233	-0.0914286
2	12	6	1	1	2	2	2	2	1	1	2	2	2	2	2	38.856	2	6	0	0	1	1	425	425	75	403	2.77262		#DIV/0!	2	2	219	1		70	2	2	2	157.407	157.407	0
2	13	10	1	2	2	2	1	2	1	2	2	1	2	2	2	39	2	72	2，2，3	3	1	1	400	400	95	633	4.35501		#DIV/0!			306.3	2	2	99	2	2	2	144.404	144.404	-0.0918033
2	14	8	1	2	2	2	2	2	2	2	2	2	2	2	2	40	2	24	0	0	1	1	440	450	74	340.3	2.34125		#DIV/0!			209.1			63	2	2	2	113.402	115.979	-0.00512821
2	15	8	1	1	2	2	2	2	1	1	2	2	2	2	2	39	1	13	3，3，2	3	1	1	640	640	150	288.9	1.98762		#DIV/0!			170.6	1		76	2	2	2	172.043	172.043	-0.07
2	16	7	1	2	2	2	2	1	1	1	2	2	2	2	2	37.714	2	72	0	0	1	1	500	500	130	500.7	3.44479		#DIV/0!			238.1	1		50	2	2	2	163.934	163.934	-0.102941
2	17	5	1	1	2	2	2	2	2	2	2	2	2	2	2	41.714	1	48	1	1	1	1	440	450	130	494.1	3.39938		#DIV/0!						56	2	2	2	135.802	138.889	-0.00307692
2	18	6	1	2	2	2	2	2	1	2	2	2	2	2	2	40	1	48	3，0，3	2	1	1	500	500	118	505.5	3.47781		#DIV/0!			297.8			66	2	2	2	161.29	161.29	-0.03125
2	19	14	1	1	2	2	2	1	1	1	2	1	2	2	2	39.286	2	20	2	1	1	1	370	370	102	396.9	2.73065		#DIV/0!			245.2	1	1	80	2	2	2	162.281	162.281	-0.088
2	21	5	1	1	2	2	2	2	2	1	2	1	2	2	2	40.286	2	30	1	1	1	1	480	500	110	547.4	3.76608		#DIV/0!						54	2	2	2	163.543	170.358	-0.0828125
3	1	2	2	1	2	2	2	1	1	1	2	2	2	2	2	40	1	48	3，3，3	3	1	2	450	450	116	575.9	3.96216		#DIV/0!			326.8			47	2	2	2	143.312	143.312	-0.0338462
3	2	8	1	2	2	2	1	2	2	1	2	2	2	2	2	37	2	48	2，0，3	2	1	1	450	450	120	536	3.68765		#DIV/0!			247.8	1	2	68	2	2	2	150	150	-0.0625
3	3	7	1	1	2	2	2	2	1	2	2	2	2	2	2	37	1	24	0	0	1	1	400	400	95	492.6	3.38906		#DIV/0!						120	2	2	2	158.73	158.73	-0.0836364
3	4	8	1	1	2	2	2	2	2	1	2	2	2	2	2	38.571	1	40	0	0	1	1	500	500	125	380.8	2.61988		#DIV/0!						109	2	2	2	149.254	149.254	-0.0147059
3	5	7	1	1	2	2	2	2	2	2	2	2	2	2	2	37.856	1	20	0	0	1	1	600	600	137	344.7	2.37152		#DIV/0!			184			150	2	2	2	153.846	153.846	-0.0714286
3	6	7	1	1	2	2	2	2	2	2	2	2	2	2	2	40	1	24	0	0	1	1	550	550	103	370	2.54558		#DIV/0!	2	2	260.5			65	2	2	2	164.671	164.671	-0.0176471
3	7	14	1	1	2	2	2	2	2	1	2	1	2	2	2	38.714	1	18	0	0	3	1	540	540	133	218.8	1.50533		#DIV/0!				1	2	161	2	2	2	158.824	158.824	-0.0368272
3	8	7	1	1	2	2	2	2	1	2	2	2	2	2	2	38.429	1	34	0	0	1	1	520	550	134	315.9	2.17337		#DIV/0!			157.3			63	2	2	2	178.082	188.356	-0.042623
3	9	2	2	2	1	2	2	1	2	2	2	2	2	2	2	38.429	1	25	2，2，3	3	1	2	620	620	143	325.6	2.24011		#DIV/0!			526.7			51	2	2	2	172.943	172.943	-0.0688312
3	10	9	1	1	2	2	2	1	2	1	2	2	2	2	2	39.856	2	17	0	0	1	1	600	600	117	338.6	2.32955		#DIV/0!			191.6	1		82	2	2	2	157.48	157.48	-0.0592593
3	11	11	1	1	2	2	2	1	1	1	2	2	2	2	2	38	1	24	1	1	1	1	600	600	117	651.4	4.4816		#DIV/0!			369	1		112	2	2	2	164.384	164.384	-0.0266667
3	12	5	1	2	2	2	1	2	2	1	2	2	2	2	2	39.714	1	18	3，2，0	2	1	1	550	550	101	567.3	3.90299		#DIV/0!			236.5	2		120	2	2	2	169.231	169.231	-0.057971
3	13	7	2	1	2	2	2	2	2	2	2	2	2	2	2	37.571	2	17	3，3，2	3	2	2	400	400	77	720.4	4.95631		#DIV/0!			364.5			168	2	2	2	143.627	143.627	-0.022807
3	14	23	1	1	2	2	2	2	2	1	2	1	2	2	2	37.143	1	18	0	0	1	1	300	300	85	205.4	1.41314		#DIV/0!	1	1	141		2	72	2	2	2	135.44	135.44	0.0804878
3	15	5	1	2	2	2	1	2	2	1	2	1	2	2	2	39.856	2	24	2，3，0	2	1	1	450	450	230	372.5	2.56278		#DIV/0!			225.2			84	2	2	2	122.783	122.783	-0.0602564
3	16	11	1	1	2	2	2	2	2	1	2	2	2	2	2	40.429	1	20	2，2，0	2	2	1	550	550	97	443.6	3.05194		#DIV/0!	1	2	330.7	1	2	175	2	2	2	157.143	157.143	-0.0909091
3	17	7	1	2	2	2	1	2	1	1	2	1	2	2	2	41.714	2	70	0	0	1	1	500	480	120	638.4	4.39216		#DIV/0!			318	1	2	114	2	2	2	162.338	155.844	-0.0523077
3	18	6	1	1	2	2	2	2	1	1	2	2	2	2	2	40.429	2	1	2，0，0	1	1	1	450	450	96	271.7	1.86928		#DIV/0!				1		77	2	2	2	174.757	174.757	-0.00961538
3	19	5	2	1	2	2	2	2	1	2	2	2	2	2	2	40.714	1	40	0	0	1	2	600	600	130	501.4	3.4496		#DIV/0!			198			70	2	2	2	191.388	191.388	-0.0263975
3	20	4	1	1	2	2	2	2	1	1	2	2	2	2	2	40.143	1	22	2，0，0	1	1	1	425	425	115	580.6	3.9945		#DIV/0!			212			80	2	2	2	157.407	157.407	-0.0689655
3	21	6	1	1	2	2	2	1	2	1	2	2	2	2	2	40.143	1	12	1	1	1	1	400	400	110	397.7	2.73615		#DIV/0!						77	2	2	2	126.783	126.783	-0.058209
3	22	13	1	1	2	2	2	1	2	1	2	2	2	2	2	41.856	1	29	0	0	1	1	500	500	102	489.1	3.36498		#DIV/0!			249	1	2	78	2	2	2	158.228	158.228	-0.0276923
3	23	4	1	1	2	2	2	2	2	2	2	1	2	2	2	39.429	1	58	0	0	1	1	550	550	100	496.5	3.41589		#DIV/0!				1		65	2	2	2	178.571	178.571	-0.0375
3	24	20	1	1	2	2	2	2	1	1	2	2	2	2	2	38.429	1	48	1，2，0	1	1	1	450	450	137	330.6	2.27451		#DIV/0!	1	2	222	1	2	69	2	2	2	171.756	171.756	-0.126667
3	25	7	1	2	2	1	2	2	1	1	2	2	2	2	2	39.286	1	72	1	1	1	1	550	550	103	596	4.10045		#DIV/0!	1	2	312	1	2	80	2	2	2	161.765	161.765	-0.0810811
3	26	8	1	1	2	2	2	1	1	2	2	2	2	2	2	41.429	2	28	2，0，0	1	1	1	550	550	105	506.9	3.48744		#DIV/0!			374	1		94	2	2	2	160.819	160.819	-0.123077
3	27	6	1	1	2	2	2	2	1	1	2	2	2	2	2	39	1	24	2	1	1	1	550	550	135	502.3	3.4558		#DIV/0!	1	2	368.1	2		118	2	2	2	169.753	169.753	-0.0795455
3	28	2	2	1	2	2	2	1	1	2	2	2	2	2	2	39	1	48	1	1	1	2	540	550	100	480.5	3.30581		#DIV/0!	2	2	232			54	2	2	2	164.634	167.683	-0.113514
3	29	9	1	1	2	2	2	2	2	1	2	2	2	2	2	40.429	1	36	1	1	1	1	530	550	240	381	2.62126		#DIV/0!	2	2		1		68	2	2	2	151.645	157.368	-0.00142857
3	31	12	1	2	2	2	2	2	2	1	2	2	2	2	2	37.571	2	68	0	0	1	1	450	450	105	538.9	3.7076		#DIV/0!	2	2	263	1		114	2	2	2	155.172	155.172	-0.107692
3	32	8	1	1	2	2	2	2	2	1	2	2	2	2	2	38	1	24	2，0，0	1	1	1	440	450	106	582.7	4.00894		#DIV/0!			325.1			79	2	2	2	146.667	150	0.2
3	33	8	1	2	2	2	2	2	2	1	2	2	2	2	2	39.571	1	48	1，2，0	1	1	1	600	600	115	456.1	3.13794		#DIV/0!			393.1		1	51	2	2	2	163.488	163.488	0.0426136
3	34	6	1	1	2	2	2	1	1	1	2	1	2	2	2	40.143	2	20	1	1	1	1	500	500	102	243.5	1.67527		#DIV/0!						67	2	2	2	172.414	172.414	-0.0793651
3	35	3	1	1	2	2	2	1	1	2	2	2	2	2	2	37	1	72	0	0	1	1	440	450	80	444.7	3.05951		#DIV/0!			156.1			66	2	2	2	176	180	-0.137931
3	36	7	1	1	2	2	2	2	1	1	2	1	2	2	2	40.571	1	96	2，0，2	2	1	1	400	400	74	513.2	3.53079		#DIV/0!	1	2	297			139	2	2	2	153.846	153.846	-0.0714286
3	37	7	1	1	2	2	2	2	2	1	2	2	2	2	2	39	1	43	0	0	1	1	450	450	83	330.1	2.27107		#DIV/0!	1	2	204.6			88	2	2	2	151.515	151.515	-0.0419355
3	38	11	1	2	1	2	2	2	2	1	2	2	2	2	2	40.286	1	52	0	0	1	1	450	450	97	298.9	2.05642		#DIV/0!	2	2	283	1		80	2	2	2	139.319	139.319	-0.05
3	39	8	1	2	2	2	1	2	2	2	2	2	2	2	2	40	1	48	0	0	1	1	440	450	83	434.1	2.98658		#DIV/0!	1	2	206	1		83	2	2	2	149.153	152.542	-0.0166667
3	40	11	1	2	2	2	2	2	1	1	2	2	2	2	2	37.429	2	72	3	1	1	1	400	400	85	519	3.57069		#DIV/0!	2	2	265	2	1	65	2	2	2	146.52	146.52	-0.0586207
3	41	17	1	2	2	2	2	2	2	2	2	1	2	2	2	39	1	33	0	0	1	1	600	600	122	391.9	2.69625		#DIV/0!	1	1	323	1		106	2	2	2	172.166	172.166	-0.00428571
3	42	14	1	2	2	1	2	2	2	2	2	1	2	2	2	39.571	2	36	2，0，0	1	1	1	600	600	115	398.9	2.74441		#DIV/0!	1	1		1	2	83	2	2	2	170.697	170.697	-0.075
3	43	11	1	2	2	1	2	2	1	2	2	1	2	2	2	38.429	1	50	1	1	1	1	640	650	102	410.4	2.82353		#DIV/0!			232	1	1	92	2	2	2	164.103	166.667	-0.113636
3	44	5	1	1	2	2	2	2	2	1	2	1	2	2	2	38	1	48	0	0	1	1	600	600	115	406.8	2.79876		#DIV/0!	1	2	212.3			119	2	2	2	181.818	181.818	-0.0294118
3	45	10	1	2	2	2	1	2	1	1	2	2	2	2	2	40	1	48	2，0，3	2	1	1	750	750	138	613.7	4.22222		#DIV/0!	1	2	275	1	1	191	2	2	2	171.233	171.233	-0.0680851
3	46	6	1	2	2	1	2	1	2	1	2	2	2	2	2	38.714	2	50	0	0	1	1	500	500	80	506.8	3.48676		#DIV/0!	1	2	265	1	2	65	2	2	2	172.414	172.414	-0.0219224
3	47	3	1	2	2	2	1	2	2	1	2	2	2	2	2	40.143	2	50	1	1	1	1	500	500	92	427.3	2.9398		#DIV/0!	1	1	328			57	2	2	2	165.017	165.017	-0.053125
4	1	11	1	1	2	2	2	2	2	1	2	1	2	2	2	38.57	1	24	0	0	2	1	400	400	79	520.1	3.57826		#DIV/0!	2	2		1		168	2	2	2	150.094	150.094	-0.0649123
4	2	7	1	2	1	2	2	2	2	2	2	2	2	2	2	38	2	47	2，0，2	2	1	1	560	560	130	410	2.82078		#DIV/0!	1	2	375.3			100	2	2	2	160.458	160.458	0.0575758
4	3	21	1	2	2	1	2	1	1	2	2	2	2	2	2	37.429	2	20	1，2，2	2	1	1	550	550	104	751.3	5.1689		#DIV/0!			544.2		1	84	2	2	2	175.159	175.159	-0.0898551
4	4	11	1	1	2	2	2	2	2	2	2	2	2	2	2	38.571	2	30	0	0	1	1	600	600	115	634.5	4.36533		#DIV/0!	1	2	330.9			190	2	2	2	186.625	186.625	-0.0814286
4	5	12	1	2	2	2	1	1	2	2	2	2	2	2	2	37	1	10	0	0	1	1	450	450	101	411.4	2.83041		#DIV/0!	1	2		1		70	2	2	2	148.026	148.026	-0.105882
4	6	9	1	1	2	2	2	2	2	1	2	2	2	2	2	40.429	1	66	0	0	1	1	550	550	87	443.5	3.05126		#DIV/0!	2	2		1	2	64	2	2	2	158.96	158.96	-0.0388889
4	9	8	1	1	2	2	2	2	2	1	2	1	2	2	2	38.286	2	24	0	0	1	1	550	550	95	480.3	3.30444		#DIV/0!	1	1	217			73	2	2	2	175.719	175.719	-0.0794118
4	10	8	1	1	2	2	2	2	2	2	2	2	2	2	2	37.714	2	84	2	1	1	1	430	450	93	472.4	3.25009		#DIV/0!	1	2	280			120	2	2	2	204.762	214.286	-0.0454545
4	11	6	1	2	2	2	1	2	2	2	2	2	2	2	2	38.143	2	80	2，0，3	2	1	1	400	400	98	610.2	4.19814		#DIV/0!	1	2	289.8			85	2	2	2	156.863	156.863	-0.105263
4	12	14	1	1	2	2	2	1	2	2	2	1	2	2	2	40	1	48	2，3，2	3	1	1	400	400	74	387	2.66254		#DIV/0!	1	2	225	1	2	71	2	2	2	166.667	166.667	-0.111111
4	13	8	1	1	2	2	2	1	2	1	2	2	2	2	2	41.429	1	20	0	0	1	1	550	550	96	346.5	2.3839		#DIV/0!	1	2		1		69	2	2	2	190.311	190.311	-0.052459
4	14	7	1	1	2	2	2	2	2	2	2	2	2	2	2	41.143	1	23	0	0	1	1	600	600	118	298.7	2.05504		#DIV/0!	1	2	155		2	53	2	2	2	166.667	166.667	-0.0243902
4	15	8	1	2	2	2	2	2	1	1	2	1	2	2	2	40.714	2	30	0	0	1	1	500	500	80	380	2.61438		#DIV/0!	1	2	246			65	2	2	2	156.74	156.74	-0.003125
4	16	9	1	1	2	2	2	2	1	1	2	2	2	2	2	40.571	1	15	0	0	1	1	500	500	65	233.5	1.60647		#DIV/0!	2	2	160	1	2	42	2	2	2	160.256	160.256	-0.0686567
4	17	8	1	1	2	2	2	1	2	1	2	1	2	2	2	40.571	2	19	0	0	1	1	500	500	88	208.8	1.43653		#DIV/0!	2	2				62	2	2	2	150.602	150.602	-0.0514286
4	18	4	1	2	2	2	1	1	1	1	2	2	2	2	2	38	1	44	0	0	1	1	500	500	81	466.2	3.20743		#DIV/0!	1	2	244			101	2	2	2	167.504	167.504	-0.0671875
4	19	7	1	1	2	2	2	2	1	2	1	2	2	2	1	39.571	2	72	1	1	1	1	625	625	100	491.3	3.38012		#DIV/0!			299.6	1		65	2	2	1	164.474	164.474	-0.05
4	20	11	1	1	2	2	2	2	1	1	2	1	2	2	2	39.714	2	46	0	0	1	1	490	500	75	486.3	3.34572		#DIV/0!	2	2	223.7	1	2	45	2	2	2	156.051	159.236	-0.0764706
4	21	5	1	1	2	2	2	2	1	2	2	2	2	2	2	41	2	30	2,0,3	2	1	1	450	450	79	670.5	4.613		#DIV/0!	2	2		1		69	2	2	2	174.419	174.419	-0.0444444
4	22	5	2	2	2	2	2	2	1	1	2	2	2	2	2	40.429	2	36	2，0，0	1	1	2	480	500	137	400.3	2.75404		#DIV/0!	2	2	294			128	2	2	2	157.377	163.934	-0.128571
4	23	14	1	1	2	2	2	2	1	1	2	1	2	2	2	41	1	18	0	0	1	1	550	550	95	241	1.65807		#DIV/0!	2	2	103.8	1	1	66	2	2	2	189.655	189.655	-0.0333333
4	24	6	1	2	2	2	1	1	2	1	2	2	2	2	2	37	2	48	3，3，3	3	1	1	300	300	82	667.1	4.58961		#DIV/0!			408	1	1	122	2	2	2	125	125	-0.157895
4	25	9	1	2	1	2	2	2	2	1	2	1	2	2	2	40.429	2	12	2，2，0	2	1	1	400	450	82	385.7	2.65359		#DIV/0!	1	2		2		70	2	2	2	131.148	147.541	0.00660066
4	26	6	1	1	2	2	2	2	1	1	1	2	2	2	2	38.714	1	2	2	1	1	1	550	550	79	542.4	3.73168		#DIV/0!	1	2	273	1		76	2	2	2	187.713	187.713	-0.0393443
4	27	5	1	1	2	2	2	2	1	2	2	2	2	2	2	40	1	72	0	0	1	1	630	650	143	405.7	2.79119		#DIV/0!	2	2	307.8		2	79	2	2	2	166.227	171.504	-0.0756098
4	28	11	2	2	2	1	2	2	1	2	2	2	2	2	2	40	2	72	2，3，2	3	1	2	500	500	105	751.8	5.17234		#DIV/0!	2	2	564.1	2	1	114	2	2	2	156.25	156.25	-0.0857143
4	29	7	1	1	2	2	2	1	1	1	2	2	2	2	2	37	2	30	3，2，2	3	1	1	550	550	75	675.1	4.64465		#DIV/0!	2	2		2		59	2	2	2	185.811	185.811	-0.0295082
4	30	10	1	2	2	1	2	2	2	1	2	2	2	2	2	39	1	39	0	0	1	1	420	420	95	458.9	3.15721		#DIV/0!	2	2	277	1	2	148	2	2	2	146.341	146.341	-0.0741935
4	31	8	1	1	2	2	2	2	2	1	2	2	2	2	2	40.429	1	24	1	1	1	1	540	550	110	505.4	3.47712		#DIV/0!	2	2	247	1	2	93	2	2	2	161.194	164.179	-0.0642458
4	32	10	1	1	2	2	2	2	2	2	2	2	2	2	2	39	1	24	1	1	1	1	480	500	92	570.2	3.92294		#DIV/0!	2	2	258	1	1	75	2	2	2	160	166.667	-0.0769231
4	33	9	1	1	2	2	2	2	2	2	2	2	2	2	2	40.714	2	32	2，0，0	1	1	1	600	600	100	407.8	2.80564		#DIV/0!	2	2	295.1	1	2	120	2	2	2	156.047	156.047	-0.0141026
4	34	21	1	1	2	2	2	2	1	2	2	2	2	2	2	40.143	1	93	0	0	1	1	550	550	86	434.4	2.98865		#DIV/0!	2	2	179.6	1	1	145	2	2	2	160.116	160.116	-0.00434783
4	35	14	1	1	2	2	2	2	2	1	2	2	2	2	2	39.429	1	96	0	0	1	1	540	550	98	504.8	3.473		#DIV/0!	2	2	258		2	72	2	2	2	176.471	179.739	-0.15
4	36	13	1	1	2	2	2	2	1	2	2	2	2	2	2	40	1	48	1	1	1	1	640	650	107	433.9	2.98521		#DIV/0!	2	2		1	2	62	2	2	2	159.601	162.095	-0.108889
4	38	10	1	1	2	2	2	2	1	1	2	2	2	2	2	40	2	70	0	0	1	1	550	550	74	659.8	4.53939		#DIV/0!	1	2		1	2	63	2	2	2	179.739	179.739	-0.184
4	39	6	1	1	2	2	2	2	1	2	2	2	2	2	2	37	1	19	1	1	1	1	600	600	110	400.1	2.75267		#DIV/0!	2	2	221			77	2	2	2	164.835	164.835	-0.078481
4	40	7	1	1	2	2	2	2	1	1	2	2	2	2	2	40.571	2	24	1	1	1	1	600	600	94	311	2.13966		#DIV/0!				1		45	2	2	2	160.428	160.428	-0.0878049
4	41	7	1	1	2	2	2	2	2	1	2	2	2	2	2	39.714	1	24	0	0	1	1	480	500	90	434.1	2.98658		#DIV/0!	2	2	292.3			148	2	2	2	139.535	145.349	-0.0826667
4	42	4	1	1	2	2	2	2	2	2	2	2	2	2	2	39	2	48	0	0	1	1	450	450	87	388.5	2.67286		#DIV/0!	1	2				94	2	2	2	163.636	163.636	-0.0517241
4	43	6	1	1	2	2	2	1	2	1	2	2	2	2	2	40.143	2	2	0	0	1	1	480	500	78	400.9	2.75817		#DIV/0!	1	2				45	2	2	2	170.819	177.936	-0.0474576
4	44	7	1	1	2	2	2	2	2	1	2	2	2	2	2	38.143	2	13	0	0	1	1	480	500	94	271.6	1.86859		#DIV/0!	2	2		1		65	2	2	2	146.789	152.905	-0.00909091
4	46	7	1	1	2	2	2	2	2	1	2	2	2	2	2	40.143	1	24	2	1	1	1	500	500	110	339.2	2.33368		#DIV/0!	2	2			2	68	2	2	2	173.611	173.611	-0.1
4	47	3	1	2	2	1	2	2	2	2	2	2	2	2	2	38.571	2	72	2	1	1	1	380	400	67	365.3	2.51324		#DIV/0!	1	2	183			63	2	2	2	149.02	156.863	-0.0377358
4	48	2	1	2	2	2	1	2	2	2	2	2	2	2	2	41.714	2	24	2	1	1	1	500	500	90	536.1	3.68834		#DIV/0!	2	2				47	2	2	2	163.934	163.934	-0.0757576
4	49	14	1	1	2	2	2	2	2	1	2	2	2	2	2	39.143	1	24	0	0	1	1	450	450	80	553.7	3.80943		#DIV/0!	2	2	248.5	1	1	72	2	2	2	140.625	140.625	0.0666667
4	50	28	1	2	1	2	2	2	2	2	2	2	2	2	2	40.429	2	30	2，3，3	3	2	1	600	600	108	962.4	6.62126		#DIV/0!	2	2		2	1	106	2	2	2	157.895	157.895	-0.0731707
4	51	9	1	2	2	1	2	2	2	2	2	2	2	2	2	38	2	96	0	0	1	1	550	550	92	614	4.22429		#DIV/0!	2	2		1	2	68	2	2	2	164.179	164.179	-0.0428571
4	52	4	1	2	2	2	2	2	2	2	2	2	2	2	2	37	2	96	2	1	1	1	350	350	71	493.1	3.3925		#DIV/0!	1	2	233.3	1		62	2	2	2	165.877	165.877	-0.138776
4	53	7	2	1	2	2	2	2	2	2	1	1	2	1	1	39.429	1	7	3，3，3	3	1	2	500	500	102	483.4	3.32577		#DIV/0!	1	2	306	2		66	2	1	1	152.905	152.905	0.09
4	54	4	1	2	2	2	1	2	2	2	2	2	2	2	2	37.571	2	44	0，0，0	0	1	1	500	500	85	367.1	2.52563		#DIV/0!	2	2	206.6	1		16	2	2	2	182.482	182.482	-0.0866667
4	55	4	1	2	2	2	1	2	2	1	2	2	2	2	2	39.714	2	48	0	0	1	1	650	650	123	431.2	2.96663		#DIV/0!	1	2	235.9	1		69	2	2	2	161.692	161.692	-0.0195122
4	56	6	1	1	2	2	2	2	2	2	2	2	2	2	2	38.143	1	48	1，0，0	1	1	1	600	600	87	355.3	2.44444		#DIV/0!	2	2	279.9	1		60	2	2	2	161.725	161.725	-0.0725
4	58	4	1	1	2	2	2	2	2	2	2	2	2	2	2	39.286	1	48	0	0	1	1	490	490	102	460.9	3.17097		#DIV/0!				2		70	2	2	2	158.576	158.576	-0.0911765
5	1	7	1	1	2	2	2	2	2	1	2	2	2	2	2	39.143	2	24	1	1	1	1	420	450	95	418	2.87582		#DIV/0!	1	2		1		72	2	2	2	157.009	168.224	-0.0775862
5	2	1	2	2	2	2	1	2	2	2	2	2	2	2	2	38	2	48	2，2，3	3	1	2	290	290	78	436.1	3.00034		#DIV/0!	2	2	227			17	2	2	2	151.042	151.042	-0.127273
5	3	2	2	2	2	2	1	2	2	1	2	2	2	2	2	40.714	2	72	2，2，3	3	1	2	440	450	68	592.8	4.07843		#DIV/0!						46	2	2	2	165.103	168.856	0.045098
5	4	4	1	1	2	2	2	2	2	1	2	2	2	2	2	40	1	19	0	0	1	1	430	450	82	346.3	2.38252		#DIV/0!	1	2	213.4			65	2	2	2	157.509	164.835	-0.0586207
5	5	6	1	1	2	2	2	1	2	1	2	2	2	2	2	38.856	2	48	3，3，3	3	1	1	530	550	102	487	3.35053		#DIV/0!	2	2		2		106	2	2	2	138.925	144.168	-0.04625
5	6	5	1	1	2	2	2	2	2	2	2	1	2	2	2	40	2	29	0	0	1	1	530	550	215	363.4	2.50017		#DIV/0!	1	2		1		48	2	2	2	158.209	164.179	-0.056338
5	7	19	1	1	2	2	2	2	2	2	2	1	2	2	2	40.143	2	10	1	1	1	1	420	450	123	444.1	3.05538		#DIV/0!	1	2		1	1	56	2	2	2	146.853	157.343	-0.0466667
5	8	8	1	2	2	1	2	2	2	2	2	2	2	2	2	40.143	1	72	2，2，2	2	1	1	530	550	82	489.8	3.3698		#DIV/0!	1	2		2		75	2	2	2	156.112	162.003	-0.0409605
5	9	4	1	1	2	2	2	2	2	2	2	2	2	2	2	40.286	2	44	1	1	1	1	500	500	123	342.4	2.35569		#DIV/0!	1	2		1		69	2	2	2	173.611	173.611	-0.0709677
5	10	9	1	2	1	2	2	2	2	2	1	2	2	2	2	40	2	20	2，2，3	3	1	1	420	450	110	301.6	2.07499		#DIV/0!	1	2		2		82	2	2	2	138.158	148.026	-0.0193548
5	11	5	1	1	2	2	2	2	2	2	2	2	2	2	2	41.286	1	21	0	0	1	1	530	550	113	381.4	2.62401		#DIV/0!	1	2	239			64	2	2	2	169.6	176	-0.0530303
5	12	7	1	1	2	2	2	2	2	1	2	1	2	2	2	37.571	1	48	0	0	1	1	450	450	106	400.2	2.75335		#DIV/0!	1	2	206			72	2	2	2	144	144	-0.107143
5	13	11	1	1	2	2	2	2	1	2	1	2	2	2	2	40.429	2	31	0	0	1	1	600	650	158	363.6	2.50155		#DIV/0!	1	2		1	2	66	2	2	2	157.895	171.053	-0.0379747
5	14	8	1	1	2	2	2	2	2	1	2	2	2	2	2	38.571	1	12	2,2,0	2	1	1	500	500	125	526.3	3.62092		#DIV/0!	1	2		2	2	72	2	2	2	175.439	175.439	-0.161765
5	15	16	1	1	2	2	2	1	2	1	2	2	2	2	2	37.856	2	16	3，3，3	3	1	1	500	500	90	537.1	3.69522		#DIV/0!	1	2	321.3	2	1	69	2	2	2	212.314	212.314	-0.127778
5	16	9	1	2	2	2	2	2	2	2	2	2	2	2	2	40.429	2	20	0	0	1	1	500	500	116	272.1	1.87203		#DIV/0!	1	2		1	1	67	2	2	2	178.571	178.571	-0.0344828
5	17	13	1	1	2	2	2	2	2	2	2	2	2	2	2	39.571	1	0	0	0	1	1	530	550	95	471.6	3.24458		#DIV/0!	1	2		1	1	42	2	2	2	161.094	167.173	-0.0861111
5	18	12	1	1	2	2	2	2	2	2	2	2	2	2	2	39.571	1	72	0	0	1	1	430	450	107	317.9	2.18713		#DIV/0!	1	2	205	1	2	86	2	2	2	129.909	135.952	-0.0542857
5	19	5	1	1	2	2	2	2	2	2	2	2	1	2	2	38.856	2	57	2，3，0	2	1	1	550	550	140	508.4	3.49776		#DIV/0!	1	2		2	1	69	1	2	2	178.571	178.571	-0.0666667
5	20	20	1	1	2	2	2	1	2	1	2	2	2	2	2	37.714	1	48	2，0，0	1	1	1	430	450	111	359.4	2.47265		#DIV/0!	1	2	218.2	1	1	71	2	2	2	157.798	165.138	-0.0603448
5	21	5	1	1	2	2	2	2	2	1	2	1	2	2	2	38.714	1	34	0	0	1	1	480	500	106	468.5	3.22325		#DIV/0!	1	2	220.2	3	3	51	2	2	2	128.171	133.511	-0.06375
5	22	10	1	1	2	2	2	2	2	1	2	1	2	2	2	37	1	24	0	0	1	1	530	550	119	404.9	2.78569		#DIV/0!	1	1		2	2	43	2	2	2	167.722	174.051	-0.0125
5	23	5	1	2	1	2	2	2	1	1	2	2	2	2	2	39.286	1	1	2，3，2	3	1	1	430	450	105	412.2	2.83591		#DIV/0!	1	1	247	1	1	69	2	2	2	143.333	150	-0.0322581
5	24	9	1	1	2	2	2	2	1	1	1	2	2	2	2	40	1	36	1	1	1	1	480	500	140	344.5	2.37014		#DIV/0!	1	1		1	2	46	2	2	2	150	156.25	-0.0588235
5	25	11	1	1	2	2	2	2	1	1	2	2	2	2	2	37	2	34	2	1	1	1	430	450	137	390.8	2.68868		#DIV/0!	1	2		1	1	112	2	2	2	140.753	147.3	-0.101471
5	26	15	1	1	2	2	2	2	1	1	2	2	2	2	2	38.571	1	65	0	0	1	1	550	550	107	372.3	2.5614		#DIV/0!	1	2		2	2	38	2	2	2	157.819	157.819	-0.12875
5	27	6	1	1	2	2	2	2	1	2	2	2	2	2	2	38	1	14	2，0，0	1	1	1	430	450	92	489.4	3.36705		#DIV/0!	1	2		1		61	2	2	2	161.23	168.729	0.0668
5	28	6	1	1	2	2	2	2	2	1	2	1	2	2	2	39.429	2	3	2，2，2	2	1	1	420	450	110	524.6	3.60922		#DIV/0!	1	2				57	2	2	2	138.614	148.515	-0.053125
5	29	8	1	2	2	2	2	2	1	1	1	1	2	2	2	40.286	2	10	2，2，2	2	1	1	550	550	114	313.7	2.15824		#DIV/0!	1	2		1	1	37	2	2	2	200.73	200.73	-0.00363636
5	30	8	1	1	2	2	2	2	1	1	2	1	2	2	2	40.286	2	37	2，2，0	2	1	1	430	450	88	430.4	2.96113		#DIV/0!	1	2		1		66	2	2	2	168.627	176.471	-0.0192308
5	31	23	1	1	2	2	2	1	1	2	2	2	2	2	2	40.429	1	72	1	1	1	1	610	650	119	403.2	2.77399		#DIV/0!	1	1		1	2	65	2	2	2	165.986	176.871	-0.0576923
5	32	5	1	1	2	2	2	2	1	1	1	2	2	2	2	37.429	2	24	2，0，0	1	1	1	450	450	84	428.9	2.95081		#DIV/0!	1	2			1	49	2	2	2	172.084	172.084	-0.113559
5	33	4	1	2	2	2	1	2	1	2	2	2	2	2	2	38.429	1	70	2	1	1	1	540	550	145	442.4	3.04369		#DIV/0!	1	2				67	2	2	2	174.194	177.419	-0.0606061
5	34	3	2	2	1	2	2	1	1	1	2	2	2	2	2	39.143	2	13	2，2,3	3	2	2	480	500	97	452.8	3.11524		#DIV/0!	1	1					2	2	2	151.899	158.228	-0.0276923
5	35	4	1	1	2	2	2	2	1	2	2	2	2	2	2	39.714	1	41	2	1	1	1	430	450	103	410.7	2.82559		#DIV/0!	1	2		1		72	2	2	2	130.898	136.986	-0.0746479
5	36	2	2	2	2	2	1	2	1	2	1	1	2	2	2	37	2	24	3，3，3	3	1	2	420	450	85	559.7	3.85071		#DIV/0!	1	2	559.7				2	2	2	140	150	0
6	1	21	1	1	2	2	2	2	1	1	2	2	2	2	2	38	1	6	2，2，0	2	1	1	530	550	106	534.9	3.68008		#DIV/0!	1	1	187.5	2	2	83	2	2	2	167.722	174.051	-0.0705882
6	2	10	1	2	1	2	2	2	2	1	2	1	2	2	2	40.571	2	5	2，2，0	2	1	1	530	550	162	350.9	2.41417		#DIV/0!	1	2		1		65	2	2	2	158.921	164.918	0.0587302
6	3	8	1	2	2	2	1	2	2	2	1	1	2	2	2	39.429	1	72	1	1	1	1	400	400	86	399.2	2.74647		#DIV/0!	1	2		1	2	76	2	2	2	170.94	170.94	-0.0947776
6	4	6	1	1	2	2	2	2	2	2	2	2	2	2	2	40.429	1	24	0	0	1	1	530	550	120	409.7	2.81871		#DIV/0!	2	2		1	2	76	2	2	2	126.19	130.952	-0.0666667
6	5	9	1	1	2	2	2	1	2	2	2	1	2	2	2	38	2	24	3，3，3	3	1	1	430	450	91	492.7	3.38975		#DIV/0!	1	2				91	2	2	2	161.654	169.173	-0.0431655
6	6	3	2	2	2	2	2	1	2	2	2	2	2	2	2	39.286	2	24	2，2，3	3	1	2	540	550	160	375.8	2.58548		#DIV/0!	2	2					2	2	2	152.113	154.93	-0.0166205
6	7	6	1	1	2	2	2	1	1	1	2	2	2	2	2	39.429	1	30	0	0	1	1	630	650	115	593	4.07981		0.82	1	2	588.5			92	2	2	2	156.912	161.893	-0.0662791
6	8	7	1	2	2	2	2	2	1	2	2	2	2	2	2	38	1	24	2，0，0	1	1	1	310	325	69	418.8	2.88132		#DIV/0!	2	2		1		107	2	2	2	143.519	150.463	-0.136
6	9	7	1	2	2	2	2	2	1	1	2	2	2	2	2	38	1	72	2，0，0	1	1	1	264	275	67	307.1	2.11283		#DIV/0!	1	2		1		37	2	2	2	150.427	156.695	-0.1
6	10	12	1	1	2	2	2	1	1	2	2	2	2	2	2	37	1	48	2,3,3	3	1	1	430	450	100	457.8	3.14964		#DIV/0!	2	2		2	1	58	2	2	2	149.565	156.522	-0.128788
6	11	13	1	2	2	2	1	2	1	2	2	2	2	2	2	41.571	2	7	2，0，0	1	1	1	430	450	95	299.2	2.05848		#DIV/0!	1	2	275.8	1	2	143	2	2	2	144.538	151.261	-0.0984848
6	12	10	1	1	2	2	2	1	1	2	2	2	2	2	2	40	2	89	0	0	1	1	540	550	118	391.7	2.69487		#DIV/0!	1	2		1	2	71	2	2	2	147.945	150.685	0.0138889
6	13	2	2	2	2	2	1	1	1	1	2	2	2	2	2	38.571	2	23	2，2，	2	1	2	450	450	102	456.4	3.14001		#DIV/0!	1	2				43	2	2	2	151.515	151.515	-0.0861538
6	14	4	2	2	2	2	1	2	1	2	2	1	2	2	2	37.286	2	72	0	0	1	2	550	550	122	464.2	3.19367		#DIV/0!	2	2	247.5		1	92	2	2	2	162.242	162.242	-0.0314286
6	15	8	1	1	2	2	2	2	1	1	2	2	2	2	2	39.143	1	24	0	0	1	1	530	550	120	447.8	3.08084		#DIV/0!	2	2		1		107	2	2	2	161.585	167.683	-0.0208955
6	16	8	1	1	2	2	2	1	1	2	2	1	2	2	2	40	2	15	0	0	1	1	540	550	105	224.2	1.54248		#DIV/0!	1	2	220.5			46	2	2	2	158.824	161.765	-0.0860215
6	17	4	1	1	2	2	2	2	1	2	1	2	2	2	2	41.143	1	24	2，0，2	2	1	1	500	550	109	341.4	2.34881		#DIV/0!	1	1	243.1			87	2	2	2	165.017	181.518	0.0448276
6	18	3	2	1	2	2	2	2	1	2	2	2	2	2	2	38.286	2	48	3，2，3	3	1	2	530	550	122	695.3	4.78363	35.3	1.35513	1	2	370.6			57	2	2	2	174.629	181.219	-0.0515625
6	19	6	1	1	2	2	2	1	1	1	2	2	2	2	2	37.856	1	22	0	0	1	1	550	550	97	308.7	2.12384		#DIV/0!	1	2	233.2	2		45	2	2	2	164.425	164.425	-0.0577465
6	20	6	1	2	2	2	1	2	1	2	2	2	2	2	2	39.143	1	26	2，2,0	2	1	1	550	600	111	428.6	2.94874		#DIV/0!	1	2	225.7	2		97	2	2	2	164.179	179.104	-0.0147059
6	21	11	1	2	1	2	2	2	2	1	2	2	2	2	2	37.143	1	16	1	1	1	1	430	450	92	316.9	2.18025		#DIV/0!	2	2	212.9		1	114	2	2	2	131.7	137.825	-0.0536232
6	22	10	1	1	2	2	2	2	1	1	2	2	2	2	2	39.286	2	50	2,2,0	2	1	1	430	450	130	439.2	3.02167		#DIV/0!	2	2	205.9	1	1	91	2	2	2	161.654	169.173	-0.113333
6	23	6	1	2	2	2	2	2	1	1	2	2	2	2	2	38.429	1	24	0	0	1	1	430	450	95	398	2.73822		#DIV/0!	1	2				63	2	2	2	145.516	152.284	-0.0467742
6	24	6	1	1	2	2	2	2	2	2	2	2	2	2	2	40	2	24	0	0	1	1	480	500	140	583.8	4.01651		#DIV/0!	2	2	312.3			87	2	2	2	161.616	168.35	-0.0419355
6	25	9	1	1	2	2	2	2	1	2	2	2	2	2	2	39.714	2	24	0	0	1	1	540	550	110	562.2	3.86791		#DIV/0!	2	2	301.2	1	1	78	2	2	2	154.728	157.593	-0.105128
6	26	11	1	2	2	1	2	1	2	2	2	2	2	2	2	39.571	1	72	2	1	1	1	440	450	100	527.2	3.62711		#DIV/0!	2	2		1	1	69	2	2	2	156.306	159.858	-0.0457627
6	27	3	2	1	2	2	2	2	2	2	2	2	2	2	2	37.714	1	38	2	1	1	2	550	550	102	466.6	3.21018		#DIV/0!	1	2	272.8			72	2	2	2	154.062	154.062	-0.0727273
6	28	4	1	1	2	2	2	2	1	2	2	2	2	2	2	40.571	2	52	0	0	1	1	540	550	111	373.6	2.57035		#DIV/0!	1	2				92	2	2	2	159.057	162.003	-0.043662
6	29	9	1	1	2	2	2	2	1	1	1	2	2	2	2	38.429	2	6	0	0	1	1	500	550	135	289.5	1.99174		#DIV/0!	1	2	213			59	2	2	2	170.068	187.075	-0.02
6	30	2	2	2	2	2	1	2	1	1	2	2	2	2	2	41.286	1	24	0	0	1	2	440	450	88	485.7	3.34159		#DIV/0!	1	2				50	2	2	2	166.038	169.811	-0.0862069
6	31	7	1	1	2	2	2	2	1	1	2	1	2	2	2	40.714	2	48	2	1	1	1	430	450	82	512.3	3.5246		#DIV/0!	1	2	224.1	2		74	2	2	2	151.408	158.451	-0.083871
6	32	7	1	2	1	2	2	2	1	1	2	2	2	2	2	37.856	2	13	2	1	2	1	530	550	132	455.9	3.13657		#DIV/0!	1	2				120	2	2	2	165.625	171.875	-0.157895
6	33	13	1	1	2	2	2	2	2	1	2	2	2	2	2	40	2	23	0	0	1	1	430	450	102	313.8	2.15893		#DIV/0!	1	2	134.9		1	53	2	2	2	136.943	143.312	0.0466667
6	34	19	1	2	1	2	2	1	1	1	1	1	2	2	2	39	1	0	2，2，0	2	3	1	530	550	114	279.7	1.92432		#DIV/0!	1	1		1	1	118	2	2	2	176.667	183.333	-0.0625
6	35	11	1	1	2	2	2	2	1	1	2	2	2	2	2	38.429	1	40	2	1	1	1	440	450	75	388.8	2.67492		#DIV/0!	1	2	226.1	1	1	138	2	2	2	159.132	162.749	-0.116613
6	36	4	1	1	2	2	2	1	1	2	2	1	2	2	2	40.429	2	4	2	1	1	1	530	550	119	249.1	1.71379		#DIV/0!	1	2	162.2			75	2	2	2	157.27	163.205	0
6	37	8	1	1	2	2	2	2	1	1	2	2	2	2	2	40	2	0	2，0，0	1	1	1	430	450	87	374.2	2.57448		#DIV/0!	1	1	322.6	1		89	2	2	2	149.826	156.794	-0.0741935
6	38	8	1	1	2	2	2	2	2	1	2	2	2	2	2	39.714	2	24	0	0	1	1	430	450	105	376.8	2.59236		#DIV/0!	1	2	171.5		2	64	2	2	2	158.672	166.052	0.0037037
6	39	6	1	1	2	2	2	2	1	1	1	1	2	2	2	38.429	1	36	0	0	1	1	430	450	93	347.2	2.38872		#DIV/0!	2	2		1		64	2	2	2	174.797	182.927	-0.0352941
6	40	9	1	1	2	2	2	2	1	2	2	2	2	2	2	40.286	1	72	0	0	1	1	460	500	90	391.5	2.6935		#DIV/0!	2	2	215.1	1	1	51	2	2	2	172.285	187.266	-0.0793103
6	41	4	1	1	2	2	2	1	1	2	2	1	2	2	2	41.714	1	21	0	0	1	1	480	500	117	241.9	1.66426		#DIV/0!	1	2	160.4			70	2	2	2	169.611	176.678	-0.17971
6	42	11	1	1	2	2	2	2	1	2	2	2	2	2	2	40.571	2	24	2	1	1	1	580	600	93	349.5	2.40454		#DIV/0!	1	2	119		2	63	2	2	2	164.306	169.972	0.0202312
6	43	8	1	1	2	2	2	1	1	1	2	1	2	2	2	41	1	2	2，3，3	3	1	1	510	550	130	551	3.79085		#DIV/0!	1	2	282.2	2	1	73	2	2	2	175.862	189.655	-0.107692
6	44	8	1	1	2	2	2	2	2	2	1	2	2	2	2	38	1	72	0	0	1	1	550	550	101	358.5	2.46646		#DIV/0!	1	2			2	72	2	2	2	171.875	171.875	0.015873
6	45	9	1	1	2	2	2	1	2	1	2	2	2	2	2	40	2	19	2，0，2	2	1	1	430	450	102	343	2.35982		#DIV/0!	1	2		2		63	2	2	2	159.851	167.286	-0.146032
6	46	9	1	1	2	2	2	2	1	1	2	1	2	2	2	39	1	24	1，0，0	1	1	1	550	550	130	381.8	2.62676		#DIV/0!	1	2	219.4	1		60	2	2	2	164.671	164.671	0.0308642
6	47	8	1	1	2	2	2	2	2	1	1	1	2	2	2	38.856	1	34	0	0	1	1	440	450	72	241.6	1.66219		#DIV/0!	1	2		1		44	2	2	2	145.455	148.76	-0.0396825
6	48	2	2	2	2	2	2	1	1	2	2	2	2	2	2	39.571	2	48	2，2，2	2	1	2	495	500	104	729.1	5.01617		#DIV/0!	1	2	405.4	3		43	2	2	2	156.646	158.228	-0.0567164
6	49	14	1	1	2	2	2	2	2	2	2	2	2	2	2	39	1	48	0	0	1	1	640	650	124	410.4	2.82353		#DIV/0!	1	2	207.6	1	2	98	2	2	2	176.066	178.817	0.0385714
6	50	13	1	1	2	2	2	1	1	2	1	1	1	2	2	38.571	2	24	0	0	1	1	470	500	97	291.8	2.00757		#DIV/0!	1	2	245.2	2	2	56	1	2	2	128.767	136.986	-0.0343915
6	51	10	1	2	2	2	1	2	2	1	1	2	2	2	2	40	2	48	0	0	1	1	500	500	96	412.7	2.83935		#DIV/0!	2	2		1		45	2	2	2	164.474	164.474	-0.0193548
6	52	7	1	2	2	2	2	2	1	2	1	2	2	2	2	40.286	2	72	0	0	1	1	490	500	100	495.1	3.40626		#DIV/0!	1	2		2		120	2	2	2	144.543	147.493	-0.0450704
6	53	4	1	1	2	2	2	2	1	2	2	1	2	2	2	40.286	1	45	2，，0	1	1	1	480	500	85	424.4	2.91985		0.68			253			47	2	2	2	161.074	167.785	-0.123529
6	54	5	1	1	2	2	2	1	2	1	2	2	2	2	2	40.286	1	12	0	0	1	1	430	450	87	354.6	2.43963		#DIV/0!	1	2	155.7	1		62	2	2	2	134.375	140.625	-0.0724638
6	55	11	1	1	2	2	2	1	2	2	2	2	2	2	2	39.714	1	20	0	0	1	1	530	550	95	320.9	2.20777		#DIV/0!	1	1	138	1	1	89	2	2	2	157.27	163.205	-0.00295858
6	56	12	1	2	2	2	1	2	1	1	2	2	2	2	2	40.571	1	16	0	0	1	1	530	550	97	440.3	3.02924		0.82	1	2	399.3	1	2	87	2	2	2	158.445	164.425	-0.142308
6	57	7	1	1	2	2	2	2	1	1	2	2	2	2	2	40.429	2	48	1	1	1	1	450	450	92	633.9	4.3612		#DIV/0!	1	2	292			50	2	2	2	166.052	166.052	-0.0655172
6	58	5	1	2	2	2	1	2	1	1	2	2	2	2	2	38.286	2	48	2	1	1	1	530	550	91	421.1	2.89714		#DIV/0!	1	2		1		88	2	2	2	164.087	170.279	-0.05
6	59	12	1	1	2	2	2	1	2	1	2	2	2	2	2	39.429	1	22	2，0，2	2	1	1	530	550	92	368.6	2.53595		#DIV/0!	1	2	271.9	2	2	60	2	2	2	161.094	167.173	-0.0179104
6	60	9	1	2	2	2	2	2	1	1	1	2	2	2	2	40.286	2	29	2，0，2	2	1	1	530	550	135	587.7	4.04334		#DIV/0!	1	2	383.3	2	1	115	2	2	2	159.159	165.165	0.0246154
6	61	5	1	1	2	2	2	2	1	2	1	2	2	2	2	38.571	1	30	0	0	1	1	480	500	83	368.1	2.53251		#DIV/0!	2	2	247	2		51	2	2	2	154.341	160.772	-0.028125
6	62	7	1	1	2	2	2	2	2	2	2	2	2	2	2	37.856	1	48	1	1	1	1	480	500	105	318.2	2.1892		#DIV/0!	1	2		2		46	2	2	2	147.692	153.846	-0.0552326
6	63	11	1	1	2	2	2	1	1	1	2	1	2	2	2	40.429	1	20	0	0	1	1	480	500	75	272	1.87135		#DIV/0!	1	2	187.4		1	92	2	2	2	160.535	167.224	-0.0354839
6	64	7	1	1	2	2	2	1	1	2	2	1	2	2	2	39.714	2	48	0	0	1	1	480	500	85	418.8	2.88132		#DIV/0!	1	2	321.5	1		87	2	2	2	157.377	163.934	0
6	65	9	1	2	2	2	2	2	1	1	2	1	2	2	2	40	2	30	2，2，3	3	1	1	660	675	146	459.8	3.1634		#DIV/0!	1	2				72	2	2	2	142.549	145.788	-0.0354167
6	66	11	1	1	2	2	2	2	1	2	1	2	2	2	2	40.286	1	48	1	1	1	1	480	500	127	716.5	4.92948		#DIV/0!	1	2		2	1	40	2	2	2	143.713	149.701	-0.0457143
6	67	1	2	1	2	2	2	1	1	1	2	2	2	2	2	40	1	25	0	0	1	2	530	550	125	675.3	4.64603		#DIV/0!	1	2				18	2	2	2	162.328	168.453	-0.0106061
6	68	6	1	1	2	2	2	1	1	2	1	1	2	2	2	39.429	1	16	1	1	1	1	540	550	105	320.6	2.20571		#DIV/0!	2	2		1		94	2	2	2	181.208	184.564	-0.00666667
6	69	7	1	1	2	2	2	1	1	1	1	2	2	2	2	37.286	1	42	0	0	1	1	500	500	71	327.9	2.25593		#DIV/0!	1	2		1		62	2	2	2	168.919	168.919	-0.0420712
6	70	13	1	1	2	2	2	2	2	2	2	2	2	2	2	38.286	2	48	0	0	1	1	430	450	81	440.5	3.03062		#DIV/0!	2	2		1	2	70	2	2	2	136.725	143.084	-0.0171875
6	71	3	2	1	2	2	2	2	1	2	2	1	2	2	2	40.143	2	8	2，0，2	2	1	2	430	450	85	286.7	1.97248		#DIV/0!	1	2	185.6			65	2	2	2	143.333	150	-0.047619
7	1	11	1	2	2	2	1	2	2	2	2	2	2	2	2	40.143	1	21	0	0	1	1	430	450	69	360.2	2.47816		#DIV/0!	1	2	187.4	1		75	2	2	2	150.35	157.343	-0.0305085
6	72	3	1	1	2	2	2	2	2	1	2	2	2	2	2	39	1	50	1	1	1	1	530	550	109	451.4	3.10561		#DIV/0!	2	2		1		66	2	2	2	139.29	144.547	-0.0940476
7	2	2	2	1	2	2	2	2	2	2	2	1	2	2	2	38.856	2	40	0	0	1	2	530	550	110	306.3	2.10733		#DIV/0!	1	2	140.1	2		52	2	2	2	162.08	168.196	-0.0382353
7	3	5	1	1	2	2	2	1	1	2	2	2	2	2	2	37	1	24	0	0	1	1	430	450	94	428.3	2.94668		#DIV/0!	2	2		2		69	2	2	2	158.379	165.746	-0.0572917
7	4	10	1	2	2	2	1	2	2	2	1	2	2	2	2	38	2	24	2	1	1	1	530	550	93	620.8	4.27107		#DIV/0!	1	2	367.6	2		114	2	2	2	157.738	163.69	-0.04
7	5	5	1	1	2	2	2	2	2	2	2	2	2	2	2	38.286	1	36	1	1	1	1	430	450	89	426.5	2.9343		#DIV/0!	1	2	267.6	2		59	2	2	2	154.676	161.871	-0.0576271
7	6	13	1	2	2	2	1	2	1	1	2	2	2	2	2	37.714	2	72	0	0	1	1	440	450	80	348.4	2.39697		#DIV/0!	1	2		1	2	93	2	2	2	153.31	156.794	-0.0528053
7	7	9	1	1	2	2	2	2	2	2	2	2	2	2	2	38.429	2	48	0	0	1	1	530	550	100	507.7	3.49295	38.3	0.911997	1	2		1		72	2	2	2	165.367	171.607	-0.167532
7	8	5	1	2	2	2	2	2	2	1	2	2	2	2	2	38.429	2	48	2	1	1	1	530	550	95	650.7	4.47678		#DIV/0!	1	2	345.7	1		78	2	2	2	172.078	178.571	-0.0552147
7	9	11	1	2	2	2	1	1	1	2	2	2	2	2	2	40	1	24	0	0	1	1	420	450	103	502.9	3.45992		#DIV/0!	1	2		2	2	89	2	2	2	157.009	168.224	-0.0272727
7	10	8	1	1	2	2	2	1	1	1	2	2	2	2	2	40.143	2	48	0	0	1	1	480	500	88	425	2.92398		#DIV/0!	2	2	274.7	1	2	65	2	2	2	167.832	174.825	-0.0622951
7	11	3	2	1	2	2	2	2	1	1	2	2	2	2	2	40.429	1	31	2，2，3	3	1	2	450	450	102	406.9	2.79945		#DIV/0!	1	2	313.2			66	2	2	2	163.636	163.636	-0.0983607
7	12	3	1	1	2	2	2	2	2	2	2	2	2	2	2	41.143	1	24	2，0，3	2	1	1	430	450	87	364.4	2.50705		#DIV/0!	1	2	209.1			56	2	2	2	148.276	155.172	-0.0645161
7	14	10	1	2	2	2	1	1	1	2	2	2	2	2	2	37.429	1	70	0	0	1	1	530	550	102	423	2.91022		#DIV/0!	1	2	268.8	1	2	94	2	2	2	173.77	180.328	-0.0757576
7	15	6	1	2	1	2	2	2	2	2	2	2	2	2	2	41.714	2	20	0	0	1	1	530	550	95	362.7	2.49536		#DIV/0!	1	2	254.5			88	2	2	2	155.198	161.054	-0.0325779
7	16	4	1	1	2	2	2	2	1	2	2	2	2	2	2	38	1	80	0	0	1	1	540	550	114	428.3	2.94668		#DIV/0!	2	2				47	2	2	2	158.824	161.765	-0.0285714
7	17	9	1	2	2	2	2	2	1	2	2	2	2	2	2	38.856	2	48	0	0	1	1	430	450	100	840	5.77915		#DIV/0!	2	2	506.4			79	2	2	2	149.565	156.522	-0.00862069
7	18	8	1	1	2	2	2	2	1	2	2	2	2	2	2	38.143	1	48	0	0	1	1	430	450	80	390.8	2.68868		#DIV/0!	1	2	261.5	2		67	2	2	2	179.167	187.5	-0.0588235
7	19	9	1	1	2	2	2	2	2	1	2	2	2	2	2	39	2	36	2	1	1	1	480	500	90	581.8	4.00275		#DIV/0!	1	2	335.1	1	2	84	2	2	2	162.712	169.492	0.0535714
7	20	17	1	2	2	1	2	2	2	2	2	2	2	2	2	38.856	2	72	2，2，3	3	1	1	480	500	107	540.6	3.7193		#DIV/0!	1	2	374.3	1	2	160	2	2	2	161.616	168.35	-0.071875
7	21	6	1	2	2	2	1	2	1	2	2	2	2	2	2	38.571	1	70	1	1	1	1	530	550	95	500.4	3.44272		#DIV/0!	1	2		1	1	49	2	2	2	160.606	166.667	-0.0294118
7	22	13	1	1	2	2	2	2	2	2	2	2	2	2	2	39.571	1	48	0	0	1	1	580	600	110	449.7	3.09391		#DIV/0!	1	2		1	1	77	2	2	2	182.965	189.274	-0.0942857
7	23	4	1	1	2	2	2	2	2	2	2	2	2	2	2	39	1	24	0	0	1	1	430	450	133	398.6	2.74235		#DIV/0!	1	2		1		70	2	2	2	132.921	139.104	-0.0314371
7	24	14	1	2	2	2	1	2	1	2	2	2	2	2	2	39.286	1	72	1	1	1	1	490	500	82	472.3	3.2494		#DIV/0!	2	2	192.8	1	1	80	2	2	2	169.55	173.01	-0.0796178
7	25	13	1	2	2	2	2	1	1	1	1	1	2	2	2	39.286	1	40	0	0	1	1	410	450	84	418.4	2.87857		#DIV/0!	2	2	299.3	2		116	2	2	2	113.889	125	-0.0136986
7	26	10	1	2	2	2	2	2	1	1	2	1	2	2	2	38	2	30	0	0	1	1	430	450	80	433.2	2.98039		#DIV/0!	1	2		1	1	150	2	2	2	172.691	180.723	-0.0777778
7	27	6	1	2	1	2	2	2	2	2	2	2	2	2	2	38.429	2	48	0	0	1	1	540	550	78	605.5	4.16581		#DIV/0!	1	2	302.4			105	2	2	2	175.61	178.862	-0.0681818
7	28	6	1	2	2	2	1	2	1	2	1	2	2	2	2	37.856	2	48	2,2,2	2	1	1	540	550	80	446.7	3.07327		#DIV/0!	1	2	345.9	2	1	68	2	2	2	174.194	177.419	-0.0746269
7	29	7	1	2	2	2	1	1	1	2	2	2	2	2	2	37	2	48	0	0	1	1	430	450	90	456.1	3.13794		#DIV/0!	1	2		1	1	54	2	2	2	163.188	170.778	-0.0976027
7	30	11	1	1	2	2	2	2	2	2	2	2	2	2	2	38.714	1	27	0	0	1	1	430	450	88	571.1	3.92914		#DIV/0!	1	2		1		95	2	2	2	134.375	140.625	-0.135135
7	31	6	1	2	2	1	2	2	2	1	2	2	2	2	2	38.856	1	50	1,0,0	1	1	1	630	650	120	633.4	4.35776		#DIV/0!	2	2	340.9	1		81	2	2	2	157.5	162.5	0.0126582
7	32	10	1	2	2	2	2	2	1	2	2	1	2	2	2	37.571	2	48	1	1	1	1	440	450	80	465.8	3.20468		#DIV/0!	1	2		1	2	82	2	2	2	168.906	172.745	-0.0859649
7	33	5	1	2	2	2	1	1	1	1	2	3	2	2	2	38.714	1	96	1,0,0	1	1	1	450	450	70	530.1	3.64706		#DIV/0!	2	2	530.1			63	2	2	2	148.515	148.515	-0.053125
7	34	8	1	1	2	2	2	2	1	1	2	2	2	2	2	41.286	2	24	0	0	1	1	540	550	130	701.7	4.82766		#DIV/0!	1	2	351.8	1	1	114	2	2	2	184.932	188.356	-0.0730159
7	35	13	1	1	2	2	2	1	1	2	1	2	2	2	2	39.429	2	48	0	0	1	1	500	500	96	477.5	3.28517		#DIV/0!	1	2	429.1	1	2	47	2	2	2	170.068	170.068	0.05
7	36	14	1	1	2	2	2	2	1	2	2	2	2	2	2	39	2	12	1,0,3	2	1	1	420	450	75	538.5	3.70485		#DIV/0!	1	2		1		91	2	2	2	161.85	173.41	-0.0563636
7	37	7	1	1	2	2	2	2	1	2	1	1	2	2	2	38	2	24	0	0	1	1	550	550	132	465.9	3.20537		#DIV/0!	1	2		1	1	65	2	2	2	169.492	169.492	-0.0728571
7	38	10	1	2	2	1	2	1	1	2	2	2	2	2	2	38.714	1	72	1	1	1	1	430	450	80	851.1	5.85552		#DIV/0!	2	2		2	1	85	2	2	2	168.627	176.471	-0.0727273
7	39	9	1	2	2	2	1	1	1	2	1	1	2	2	2	38.571	2	30	0	0	1	1	540	550	107	613.9	4.2236		#DIV/0!	2	2	427.2	1	1	48	2	2	2	178.808	182.119	-0.0606532
7	40	8	1	1	2	2	2	2	2	2	1	2	2	2	2	37	2	72	0	0	1	1	640	650	108	798.4	5.49295	36.6	1.50081	2	2	522.7			191	2	2	2	160	162.5	0.025641
7	41	5	1	1	2	2	2	2	1	2	2	2	2	2	2	41.286	1	48	0	0	2	1	480	500	90	648.8	4.46371	39.7	1.12436	1	2		2		64	2	2	2	168.126	175.131	-0.147761
7	42	4	1	2	2	2	2	1	2	2	2	2	2	2	2	38.714	1	48	0	0	1	1	530	550	94	598.6	4.11834		#DIV/0!	1	2	417.3	1		63	2	2	2	159.639	165.663	-0.0514286
7	43	5	1	1	2	2	2	1	1	2	1	1	2	2	2	39	2	8	1，0，0	1	1	1	530	550	111	491.1	3.37874		#DIV/0!	1	2	400.8			65	2	2	2	176.667	183.333	-0.047619
7	45	12	1	2	2	2	1	2	1	1	2	1	2	2	2	37.571	1	96	0	0	1	1	440	450	76	523.7	3.60303		#DIV/0!	1	2	387.3		2	73	2	2	2	163.265	166.976	-0.101667
7	46	12	1	1	2	2	2	1	2	1	2	1	2	2	2	40	2	20	0	0	1	1	530	550	67	300.3	2.06605		#DIV/0!	1	2	225.6	1	2	115	2	2	2	181.507	188.356	-0.0580645
7	47	10	1	1	2	2	2	1	1	2	2	2	2	2	2	40	2	36	1	1	1	1	530	550	107	582.5	4.00757	36	1.11321	1	2	432.7	2		87	2	2	2	154.971	160.819	-0.0228571
7	48	21	1	1	2	2	2	1	2	2	2	1	2	2	2	38.714	1	14	0	0	1	1	450	450	90	338.1	2.32611		#DIV/0!	1	2	185.4	1	2	85	2	2	2	173.41	173.41	-0.0388889
7	49	17	1	1	2	2	2	2	2	2	2	2	2	2	2	39	1	40	0	0	1	1	530	550	111	630.2	4.33574		#DIV/0!	2	2	550.7	2	2	250	2	2	2	170.418	176.849	-0.028125
7	50	10	1	1	2	2	2	2	2	2	2	2	2	2	2	39.856	1	20	0	0	1	1	650	650	109	294.1	2.02339		#DIV/0!	2	2	151.8	2	1	59	2	2	2	160.494	160.494	-0.0169903
7	51	8	1	1	2	2	2	2	1	2	2	2	2	2	2	39	1	59	1，0，0	1	1	1	430	450	88	421	2.89646		#DIV/0!	1	2			2	85	2	2	2	149.306	156.25	-0.0857143
7	52	5	1	1	2	2	2	1	1	2	2	2	2	2	2	40.143	1	20	0	0	1	1	530	550	103	467	3.21293		#DIV/0!	2	2				62	2	2	2	175.497	182.119	0.00666667
7	53	13	1	1	2	2	2	1	1	2	1	1	2	2	2	39.714	1	12	0	0	1	1	630	650	117	349.8	2.4066		#DIV/0!	2	2	204.7	2		53	2	2	2	160.714	165.816	-0.026087
7	54	11	1	1	2	2	2	2	1	2	2	1	2	2	2	39	1	0	2，2，0	2	1	1	480	500	155	579.8	3.98899		#DIV/0!	1	2	299.5	1	2	68	2	2	2	158.155	164.745	0.0116667
7	55	14	1	1	2	2	2	1	1	2	2	1	2	2	2	40.856	1	40	1，0，0	1	1	1	500	500	80	525.7	3.61679		#DIV/0!	1	2		1	2	107	2	2	2	170.068	170.068	-0.0953846
7	56	9	1	1	2	2	2	2	1	1	2	2	2	2	2	38.714	1	38	1	1	1	1	490	500	82	479.7	3.30031		#DIV/0!	2	2	276.9			63	2	2	2	171.329	174.825	-0.0774194
7	57	6	1	1	2	2	2	2	1	1	2	2	2	2	2	39.714	1	24	0	0	1	1	520	550	105	621.2	4.27382		#DIV/0!	1	1	366.5	1		91	2	2	2	161.742	171.073	-0.0544118
7	58	5	1	2	2	2	1	1	2	1	2	2	2	2	2	40.856	1	48	0	0	1	1	630	650	157	534	3.67389		#DIV/0!	1	2		1		31	2	2	2	168	173.333	-0.0384615
7	60	7	1	1	2	2	2	1	2	1	2	2	2	2	2	39.714	2	80	0,2,0	1	1	1	540	550	93	398.1	2.73891		#DIV/0!	1	2	228.1	1	2	62	2	2	2	160.475	163.447	-0.0385714
7	61	9	1	1	2	2	2	2	2	2	2	1	2	2	2	38.571	1	4	2，2，0	2	1	1	600	600	96	441.2	3.03543		#DIV/0!	2	2	228.3	1	1	24	2	2	2	177.515	177.515	-0.0739726
7	62	7	1	1	2	2	2	1	1	2	2	1	1	2	2	38	1	48	1	1	1	1	380	400	83	403.3	2.77468		#DIV/0!	2	2	212.9	1	1	68	1	2	2	156.701	164.948	-0.0673077
7	64	8	1	2	2	2	2	2	2	2	2	1	2	2	2	39.429	1	24	2，0，3	2	1	1	480	500	110	452.6	3.11386		#DIV/0!	1	2	207.1	1	2	73	2	2	2	139.13	144.928	-0.08
7	65	5	1	2	2	2	1	2	1	2	2	2	2	2	2	39	2	36	2	1	1	1	530	550	106	486.2	3.34503		#DIV/0!	1	2	277.5			85	2	2	2	154.07	159.884	-0.0702703
7	66	14	1	1	2	2	2	1	2	2	2	1	2	2	2	37	1	0	0	0	1	1	380	400	78	451.6	3.10698		#DIV/0!	1	2			2	168	2	2	2	157.025	165.289	-0.0727969
7	67	12	1	1	2	2	2	1	1	1	1	1	2	2	2	37	1	24	2，0，0	1	1	1	430	450	90	294.3	2.02477		#DIV/0!	1	1			1	125	2	2	2	175.869	184.049	-0.0523256
7	68	24	1	1	2	2	2	2	2	2	2	2	2	2	2	38.714	1	24	2，2，0	2	1	1	530	550	105	351.6	2.41899		#DIV/0!	1	2				37	2	2	2	175.497	182.119	-0.05625
7	69	10	1	2	2	2	2	2	2	1	2	1	2	2	2	40.714	2	2	0	0	2	1	500	550	113	473.1	3.2549		#DIV/0!	1	1				144	2	2	2	136.426	150.068	-0.0721519
7	70	10	1	2	1	2	2	2	1	2	2	1	2	2	2	40.714	1	16	2,0,3	2	2	1	500	500	115	415	2.85518	28.4	1.00534	1	1	373.2			99	2	2	2	159.744	159.744	-0.0927536
7	71	1	2	2	2	2	2	1	1	2	1	2	1	2	2	39	2	48	3，3，3	3	1	2	430	450	95	492.1	3.38562		#DIV/0!	1	2	482.7				1	2	2	167.641	175.439	-0.172581
7	72	8	1	2	2	2	2	2	2	2	2	2	2	2	2	37	2	36	2，0，0	1	1	1	580	600	98	472.3	3.2494		#DIV/0!	1	2	494.2		2	88	2	2	2	164.306	169.972	-0.0194444
7	73	6	1	1	2	2	2	2	1	1	2	1	2	2	2	40.571	2	48	0	0	1	1	580	600	118	400.4	2.75473		#DIV/0!	1	2	234.5	1	1	91	2	2	2	166.906	172.662	-0.0608108
7	74	10	1	2	2	2	2	1	2	1	2	1	2	2	2	37.856	1	0	1，0，3	2	1	1	490	500	120	454.1	3.12418		#DIV/0!	1	2		2	2	77	2	2	2	154.574	157.729	-0.0676471
7	75	15	1	2	2	2	2	1	1	1	2	1	2	2	2	39	1	7	2，0，3	2	1	1	500	550	103	321.4	2.21121		#DIV/0!	1	2	170.3		2	94	2	2	2	162.866	179.153	0.0586207
8	1	12	1	2	2	2	2	1	2	2	2	2	2	2	2	40	1	48	0	0	1	1	590	600	90	403.2	2.77399		#DIV/0!	2	2	212.6		2	68	2	2	2	153.247	155.844	-0.0375
8	2	6	1	1	2	2	2	1	2	2	2	2	2	2	2	41	1	30	0	0	1	1	630	650	150	401.5	2.7623		#DIV/0!	1	2	254.9	1	3	85	2	2	2	152.174	157.005	-0.08
8	4	7	1	1	2	2	2	1	1	1	2	1	2	2	2	40	1	72	2	1	1	1	530	550	99	513.6	3.53354		#DIV/0!	1	2	240.8	2		87	2	2	2	165.625	171.875	-0.0724638
8	5	17	1	2	1	2	2	1	2	2	2	1	2	2	2	38.429	2	4	2，0，	1	1	1	450	500	120	173.6	1.19436		#DIV/0!	1	2	164.8		2	113	2	2	2	159.858	177.62	-0.0616667
8	6	11	1	1	2	2	2	1	1	2	2	1	2	2	2	38.286	1	65	2	1	1	1	480	500	111	452.2	3.11111	29.2	1.06545	1	2	254.7		2	107	2	2	2	153.355	159.744	-0.105714
8	7	6	1	1	2	2	2	2	2	1	2	1	2	2	2	39.143	2	24	0	0	1	1	420	450	75	498.6	3.43034		#DIV/0!	2	2	259.9		1	68	2	2	2	154.696	165.746	-0.0637931
8	8	6	1	2	2	1	2	2	2	1	2	1	1	2	2	40	2	45	2，2，3	3	1	1	520	550	102	497.8	3.42484		#DIV/0!	1	1	388			64	1	2	2	134.715	142.487	-0.0585366
8	9	12	1	2	2	2	2	2	2	1	1	1	2	2	2	38.571	1	54	0	0	1	1	440	450	86	353.8	2.43412	32	0.760664	1	2	300	1	2	92	2	2	2	164.486	168.224	-0.0775862
8	10	11	1	1	2	2	2	2	2	2	2	1	2	2	2	38.143	2	36	0	0	1	1	430	450	115	400.7	2.75679		#DIV/0!	1	2	185.2		2	82	2	2	2	167.969	175.781	-0.0153846
8	11	10	1	2	2	2	2	2	2	2	2	2	1	2	2	39.286	2	12	0	0	1	1	530	550	110	212.7	1.46336	40.3	0.363118	1	2	172.9	1		71	1	2	2	155.198	161.054	-0.0242857
8	12	12	1	2	1	2	2	1	1	2	2	2	2	2	2	37.856	2	1	3，1，3	3	1	1	480	500	97	198	1.36223		#DIV/0!	1	2	182.2	2	1	92	2	2	2	160	166.667	-0.0625
8	13	13	1	2	1	2	2	2	1	2	1	2	2	2	2	41.286	2	18	2	1	1	1	580	600	130	303.9	2.09082	39.8	0.52533	2	2		1	2	64	2	2	2	158.904	164.384	-0.0266667
8	14	8	1	1	2	2	2	2	2	2	1	2	2	2	2	39.429	1	12	0	0	1	1	530	550	107	525.7	3.61679	35.4	1.02169	1	1		2		66	2	2	2	180.887	187.713	0.0103448
8	15	2	2	2	2	1	2	2	2	2	2	2	2	2	2	41.571	1	48	1，2	1	1	2	480	500	80	557.4	3.83488		0.96	1	2	215.4				2	2	2	181.818	189.394	-0.0896552
8	16	4	1	1	2	2	2	2	2	2	2	2	2	2	2	38.714	1	12	0	0	1	1	480	500	105	300.5	2.06742		0.52	1	1	160.4			66	2	2	2	167.247	174.216	-0.0741935
8	17	6	1	1	2	2	2	2	2	2	2	2	2	2	2	40.571	2	24	0	0	1	1	480	500	81	327.1	2.25043	41	0.548885	1	2	226.9			89	2	2	2	152.381	158.73	-0.0454545
8	18	6	1	1	2	2	2	2	2	1	2	2	2	2	2	39.143	2	48	2，0，0	1	1	1	530	550	106	433.1	2.9797	40.3	0.739381	1	2		2		60	2	2	2	159.639	165.663	-0.0376812
8	27	14	1	2	2	2	1	不详	1	2	2	2	2	2	2	39.857	2	48	1,1,0	1	1	1	500	500	88	560.9		无			40		3	34	48.5	2	2	2	160.514	160.514	-0.11
8	19	8	1	2	2	2	1	2	2	2	2	2	2	2	2	38.571	2	55	2	1	1	1	550	550	114	553.6	3.80874		#DIV/0!	2	2				62	2	2	2	155.807	155.807	-0.0948718
8	26	8	1	2	2	2	1	1	1	2	2	2	2	2	2	38.571	2	55	1,0，0	1	1	1	500	500	114	475.7		无		无			3	无	60	2	2	2	141.643	141.643	-0.0948718
8	20	14	1	2	1	2	2	1	2	2	2	2	2	2	2	40	1	10	3，3，3	3	1	1	530	550	105	510	3.50877	31	1.13186	2	2	472.8	2	1	88	2	2	2	149.929	155.587	-0.0445946
8	24	10	1	2	2	2	1	1	1	2	2	1（0.97）	2	2	2	40.426	1	27	0，0，0	0	1	1	480	500	97	398.6		无		无			1	无		2	2	2	172.662	179.856	-0.144615
8	21	16	1	1	2	2	2	2	2	2	2	1	2	2	2	38	1	22	2，0，0	1	1	1	530	550	100	451.7	3.10767	36.4	0.853756	1	1	290.4	1	1	73	2	2	2	172.638	179.153	-0.0553846
8	22	6	1	1	2	2	2	2	2	1	2	2	2	2	2	37	2	33	0	0	1	1	430	450	95	410.6	2.82491		#DIV/0!	2	2	326.4	1		70	2	2	2	156.934	164.234	-0.0616438
8	23	15	1	1	2	2	2	2	2	1	2	2	2	2	2	39.571	1	36	0	0	1	1	480	550	95	423.5	2.91366		#DIV/0!	1	2	258	1	2	69	2	2	2	157.377	180.328	-0.0757576
8	21	9	1	1	2	2	2	1	1	2	2	2（1.01）	2	2	2	41	1	72	0，0，0	0	1	1	500	550	160	432		无		无			1	38分	46.5	2	2	2	179.211	197.133	-0.128125
8	29	9	1	1	2	2	2	1	1	2	2	2	2	2	2	37.571	1	25	1,0，0	1	1	1	500	600	129	320.6		无		无			1	无	62.5	2	2	2	149.701	179.641	-0.0849315
8	24	11	1	2	1	2	2	2	2	2	2	2	2	2	1	41.714	2	24	2，，3	2	1	1	600	650	165	624	4.29309		#DIV/0!	1	2	207.6		1	165	2	2	1	178.042	192.878	-0.0638889
8	20	7	1	2	2	2	1	不详	不详	2	2	1（0.93）	2	2	2	39.426	1	48	0，1,1	1	1	1	430	450	80	577.3		无		无			1	无	83.5	2	2	2	138.264	144.695	-0.0575758
8	19	6	1	1	2	2	2	1	不详	2	2	1	2	2	2	39.426	2	22	1,0，,0	1	1	1	510	550	87	428.2		无		72			1	无	60	2	2	2	182.796	197.133	-0.0542373
8	18	8	1	2	2	2	1	不详	不详	2	2	2	2	2	2	37.286	2	72	1,1,0	1	1	1	520	520	128	444.8		无		无			3	35分	85	2	2	2	171.901	171.901	-0.0396825
8	25	11	1	2	2	2	2	2	2	2	2	2	2	2	2	38.286	1	69	2，2，0	2	1	1	550	600	98	655	4.50636		0.99	2	2	308.9	1	2	70	2	2	2	180.624	197.044	-0.0772727
8	17	9	1	2	2	1	2	不详	不详	1	2	1	2	2	2	38	2	30	1,1,1	1	1	1	430	450	108	641.1		36.4		93			1	36分	38	2	2	2	154.399	161.58	-0.022807
8	26	4	1	2	1	2	2	1	2	2	2	2	2	2	2	41	2	6	2，2，0	2	1	1	430	450	85	461.3	3.17372	36	0.881589	1	2	270.2	1	1	88	2	2	2	136.508	142.857	-0.0454545
8	16	9	1	1	2	2	2	不详	不详	2	2	1	2	2	2	40	1	24	0,0,0	0	1	1	470	500	110	573.2		无		87			1	36分	60	2	2	2	146.875	156.25	0
8	27	10	1	1	2	2	2	1	2	1	2	1	2	2	2	40	2	12	2，2，3	3	1	1	450	450	95	334	2.2979		#DIV/0!	1	2	182.2	1		58	2	2	2	169.173	169.173	-0.0148148
8	14	9	1	2	2	2	2	不详	不详	1	2	1	2	2	2	38.714	1	48	1,2,0	1	1	1	490	500	82	556		无		无			2	37	60.5	2	2	2	174.067	177.62	-0.0919355
8	15	10	1	2	2	2	2	不详	不详	2	2	2	2	2	2	38.571	2	48	1,0,2	1	1	1	530	550	115	422.3		32.2		无			3	35分	81.5	2	2	2	172.078	178.571	-0.0222222
8	13	14	1	1	2	2	2	不详	不详	2	2	2	1	2	2	38.286	1	48	1,0,3	2	1	1	480	500	130	837.5		无		96			3	36	69	2	2	2	170.213	177.305	-0.06
8	28	7	1	2	2	2	1	1	2	1	2	2	2	2	2	40	1	6	1，0，0	1	1	1	430	450	120	225.6	1.55212		#DIV/0!	2	2				57	2	2	2	159.259	166.667	-0.0689655
8	12	8	1	1	2	2	2	不详	2	2	2	2	2	2	2	39.286	1	48	0,0,0	0	1	1	480	500	105	575		无		75			2	无	65	2	2	2	193.548	201.613	-0.027451
8	29	8	1	2	2	2	1	2	2	1	2	2	2	2	2	39.571	2	50	0	0	1	1	500	500	84	589.4	4.05504		#DIV/0!	2	2	323		2	75	2	2	2	160.256	160.256	-0.04
8	30	10	1	2	2	1	2	1	2	2	2	1	2	2	2	38	1	44	0	0	1	1	530	550	110	600.7	4.13278		0.91	2	2	544.8		2	95	2	2	2	159.159	165.165	-0.0291545
8	31	8	1	2	2	2	1	2	2	2	2	2	1	2	2	38.286	1	24	1，0，0	1	1	1	500	500	83	419.5	2.88614		#DIV/0!	2	2				93	1	2	2	162.022	162.022	-0.078806
8	11	7	1	1	2	2	2	不详	1	1	2	2	2	2	2	40.857	1	20	0,0,0	0	1	1	480	500	90	433		41.9		无			1	无	64	2	2	2	190.099	198.02	-0.0750916
8	10	10	1	2	2	2（活性处于临界值）	1	1	不详	2	2	2	2	2	2	37.286	1	36	1,0，0	1	1	1	430	450	86	503.1		34.9		无			2	35	60	2	2	2	147.766	154.639	-0.104615
8	32	11	1	1	2	2	2	2	2	2	2	2	2	2	2	38	2	20	1，0，0	1	1	1	480	500	93	386.8	2.66116	35.9	0.741271	2	2		1		91	2	2	2	146.789	152.905	-0.0296736
8	33	20	1	1	2	2	2	1	2	2	2	2	2	2	2	41	2	20	2	1	1	1	470	500	135	599.1	4.12178		1.04	1	2	390.7	2	1	72	2	2	2	138.235	147.059	-0.0810811
8	8	2	1	2	2	2	1	不详	1（7.3）	2	2	2	2	2	2	40	2	20	1,0,0	1	1	1	500	500	105	423.8		30.8			15		3	无	39.5	2	2	2	151.515	151.515	-0.0704225
8	7	9	1	1	2	2	2	不详	1	不详	不详	不详	2	2	2	38	1	10	1,0,0	1	1	1	480	500	110	311.5		35.8		82			3	无	62.5	2	2	2	160	166.667	0
8	6	10	1	2	2	1	2	不详	不详	2	2	2	1	2	2	41.429	2	70.5	2,2,0	2	1	1	650	640	120	552.4		29.8		无			1	35	90	1	2	2	166.453	163.892	-0.0702381
8	5	17	1	2	1	2	2	不详	不详	不详	2	2	2	2	2	39	2	1	2,0,0	1	1	1	400	400	115	169.1				71			3	35	54	2	2	2	167.015	167.015	-0.00208333
8	34	9	1	1	2	2	2	1	2	2	2	2	2	2	2	38	2	24	2，，2	2	1	1	480	500	100	394.8	2.7162	40.6	0.669015	1	2			2	42	2	2	2	153.6	160	-0.0671642
8	35	10	1	1	2	2	2	2	2	2	2	2	1	2	2	39.571	2	24	2，3，3	3	1	1	470	500	95	588.1	4.0461		1.15	2	2	479.8		1	85	1	2	2	147.335	156.74	-0.0885714
8	36	10	1	2	1	2	2	2	1	2	2	2	2	2	2	38.571	1	24	2	1	1	1	520	550	98	453.6	3.12074		0.72	2	2		2	2	83	2	2	2	142.857	151.099	0.12
8	4	17	1	2	2	2	1	1	不详	2	2	2	2	2	2	40.429	2	48	1,2,0	1	1	1	480	500	120	482.4		36.5		80			2	35分	87	2	2	2	148.607	154.799	-0.05
8	2	12	1	1	2	2	2	不详	2	2	2	2	2	2	2	40	2	26	0,0,0	0	1	1	520	550	94	342.6		38.5		95			3	无	60	2	2	2	144.044	152.355	-0.0373333
8	1	9	1	1	2	2	2	1	不详（血气单子模糊）	1	1	2	2	2	2	39	2	10	0,2,0	1	1	1	500	500	120	368.6		36		75			1	34	31	2	2	2	161.29	161.29	-0.03125
9	3	13	1	2	1	2	2	2	1	2	2	2	2	2	2	37.143	1	72	3，3，0	2	1	1	430	450	150	656.7	4.51806	44.7	1.01075	2	2	410.8	2	1	86	2	2	2	166.99	174.757	-0.112069
9	4	9	1	2	2	2	1	2	1	2	2	2	2	2	2	40.714	2	48	0	0	1	1	540	550	120	405.4	2.78913		#DIV/0!	2	2	423.8			84	2	2	2	173.077	176.282	-0.0823529
9	5	8	1	1	2	2	2	2	2	2	1	1	2	2	2	38.429	1	24	1，0，0	1	1	1	450	450	78	356.8	2.45476		#DIV/0!	1	2	311.7	1		48	2	2	2	154.639	154.639	-0.0612903
9	6	12	1	1	2	2	2	2	2	2	2	2	2	2	2	39.714	1	48	1	1	1	1	630	650	195	430.7	2.96319		#DIV/0!	1	2	426.7	1	2	74	2	2	2	157.5	162.5	-0.0243902
9	7	8	1	1	2	2	2	2	2	2	2	1	2	2	2	40	1	48	0	0	1	1	520	550	130	500.8	3.44548	38.4	0.897259	1	2		1	2	61	2	2	2	172.471	182.421	-0.24625
9	8	13	1	2	2	2	1	2	2	1	2	2	2	2	2	39.143	1	3	，2，0	1	1	1	430	450	90	428.5	2.94806		#DIV/0!			402.5			80	2	2	2	168.627	176.471	-0.0727273
9	10	1	2	1	2	2	2	1	2	1	2	2	2	2	2	38.571	1	24	2,3,3	3	1	2	420	450	99	667	4.58892		#DIV/0!	1	2	530.7				2	2	2	140.94	151.007	-0.06875
9	11	10	1	1	2	2	2	1	2	2	2	1	2	2	2	40	1	40	2	1	1	1	630	650	100	521.2	3.58583		#DIV/0!	1	2	521.1	2		71	2	2	2	170.27	175.676	-0.0512821
9	12	9	1	2	2	2	1	2	1	2	2	1	2	2	2	37.856	1	68	2	1	1	1	420	450	125	514	3.53629		#DIV/0!	2	2		2		70	2	2	2	154.982	166.052	-0.0966667
9	13	12	1	2	2	2	2	2	1	2	2	2	2	2	2	38.571	1	24	2	1	1	1	580	600	106	562.2	3.86791	39.5	0.979216	2	2		2	1	48	2	2	2	154.255	159.574	0.122388
9	14	8	1	1	2	2	2	2	2	2	2	2	2	2	2	38.429	2	24	1，0，0	1	1	1	460	450	112	546.1	3.75714		1.07	2	2	293.4		1	34	2	2	2	153.846	150.502	-0.08
9	15	9	1	2	1	2	2	2	1	2	2	1	2	2	2	40.286	2	72	2,2，	2	1	1	500	550	100	486.8	3.34916		#DIV/0!	1	2	235.8		1	63	2	2	2	157.729	173.502	-0.0942857
9	16	9	1	2	2	2	1	1	1	2	2	2	2	2	2	39.714	2	48	0	0	1	1	470	500	73	470.1	3.23426		#DIV/0!	1	2	365.4		2	69	2	2	2	161.79	172.117	-0.0777778
9	17	6	1	2	1	2	2	2	1	2	2	1	2	2	2	38.429	1	16	1，0，0	1	1	1	420	450	75	323.4	2.22497		#DIV/0!	2	2	332.2			93	2	2	2	152.45	163.339	-0.152308
9	18	13	1	1	2	2	2	2	1	2	2	2	2	2	2	41	1	24	2,2,3	3	1	1	488	500	120	508.5	3.49845		#DIV/0!	1	2	297.3		1	97	2	2	2	166.553	170.648	-0.0984615
9	19	17	1	2	1	2	2	2	2	2	2	2	2	2	2	40.856	1	24	0	0	1	1	500	550	85	472.8	3.25284		#DIV/0!	1	2	427.1		2	59	2	2	2	153.846	169.231	-0.084507
9	20	10	1	1	2	2	2	2	2	2	2	2	2	2	2	39.143	1	72	0	0	1	1	500	550	120	584.8	4.02339	41.2	0.976551	2	2	159.4		2	65	2	2	2	136.054	149.66	-0.125
9	21	10	1	1	2	2	2	1	2	2	2	2	2	2	2	39.286	1	24	0	0	1	1	450	500	112	539.2	3.70967	31.3	1.1852	1	1	314.3		2	88	2	2	2	152.027	168.919	-0.241026
9	22	9	1	2	2	2	2	1	1	2	2	2	2	2	2	37	2	24	2，，0	1	1	1	520	550	100	461.1	3.17234		#DIV/0!	1	2			2	45	2	2	2	160.742	170.015	0.0435484
9	23	7	1	2	2	2	1	2	1	2	2	2	2	2	2	38	2	96	1	1	1	1	500	500	90	510.9	3.51496	33.3	1.05554	2	2				94	2	2	2	170.068	170.068	-0.0360656
9	24	9	1	1	2	2	2	2	1	2	2	2	2	2	2	41.571	2	17	0	0	1	1	480	500	115	504.3	3.46956		#DIV/0!	2	2	266.6	1	2	53	2	2	2	157.377	163.934	-0.046875
9	25	10	1	1	2	2	2	2	1	2	2	2	2	2	2	39.429	2	10	0	0	1	1	470	500	90	236.3	1.62573		#DIV/0!	1	2				48	2	2	2	151.369	161.031	-0.112857
9	26	5	1	2	2	2	2	1	1	2	2	2	2	2	2	39.429	1	30	1，3，3	3	1	1	320	350	75	562.7	3.87135	38.3	1.0108	2	2				60	2	2	2	144.144	157.658	-0.0553191
9	27	7	1	1	2	2	2	2	1	2	2	2	2	2	2	38.429	1	15	2，0，3	2	1	1	400	450	95	275	1.89198		#DIV/0!	2	2	235.1			50	2	2	2	122.137	137.405	-0.138158
9	28	4	1	1	2	2	2	2	1	2	2	2	2	2	2	39.286	2	12	3，3，3	3	1	1	470	500	104	524.4	3.60784	33.4	1.08019	2	2	431			82	2	2	2	144.172	153.374	0.01875
9	29	5	1	1	2	2	2	2	2	2	2	2	2	2	2	39	2	48	2,0,2	2	1	1	320	350	62	458.4	3.15377		#DIV/0!	2	2				50	2	2	2	132.78	145.228	0.00416667
9	30	7	1	1	2	2	2	1	1	2	1	2	2	2	2	39.571	2	22	0	0	1	1	430	450	95	317.3	2.18301	38	0.574475	1	2	208			65	2	2	2	162.264	169.811	-0.0862069
9	31	7	1	1	2	2	2	2	1	2	1	2	2	2	2	40	1	24	2	1	1	1	430	500	105	563.7	3.87822		0.9	1	2	223		2	62	2	2	2	128.358	149.254	0.0151515
9	32	4	1	2	2	2	1	2	2	2	2	2	2	2	2	39.286	1	24	0	0	1	1	500	550	97	365.1	2.51187		#DIV/0!	2	2				40	2	2	2	147.059	161.765	-0.0422535
9	33	2	2	2	2	2	2	2	2	2	2	2	2	2	2	40.143	1	48	2,3,2	3	1	2	520	550	107	567.3	3.90299		#DIV/0!	2	2				38	2	2	2	149.425	158.046	-0.072
9	34	1	2	2	2	1	2	2	2	2	2	2	2	2	2	39.714	2	48	2,2，	2	1	2	420	450	90	655.8	4.51187		#DIV/0!	2	2				40	2	2	2	145.329	155.709	-0.0366667
9	35	1	2	1	2	2	2	2	1	2	2	2	2	2	2	39.286	2	72	2，3，3	3	1	2	530	550	110	596.1	4.10114	42.3	0.969536	2	2	490				2	2	2	182.759	189.655	-0.09375
9	36	8	1	1	2	2	2	1	2	2	2	2	2	2	2	39.429	1	24	2，0，0	1	1	1	480	500	115	425.7	2.92879		#DIV/0!	1	2			2	40	2	2	2	154.839	161.29	-0.0461538
9	37	7	1	1	2	2	2	2	1	2	2	2	2	2	2	40	2	48	0	0	1	1	490	500	100	545.9	3.75576		#DIV/0!	1	2				153	2	2	2	154.088	157.233	-0.116667
9	38	5	1	1	2	2	2	2	1	2	2	2	2	2	2	39.714	1	72	0	0	1	1	480	500	85	383.2	2.63639	30.5	0.864392	1	2	273	1	1	45	2	2	2	181.818	189.394	-0.12
9	39	9	1	2	2	1	2	2	2	2	2	2	2	2	2	39.856	2	48	2，0，0	1	1	1	530	550	105	472.9	3.25353		0.77	1	2			2	41	2	2	2	171.244	177.706	-0.174667
9	40	10	1	1	2	2	2	1	1	2	2	1	2	2	2	39.143	2	48	2	1	1	1	430	450	83	436.3	3.00172		0.83	2	2	278.4		2	83	2	2	2	159.259	166.667	-0.0181818
9	41	10	1	1	2	2	2	1	1	1	2	2	2	2	2	40	2	12	2，3，3	3	1	1	470	500	88	594	4.08669	40.3	1.01407	2	2	325.7	2	2	60	2	2	2	160.684	170.94	-0.113636
9	42	14	1	1	2	2	2	2	1	1	2	2	2	2	2	39.714	1	4	1，0，0	1	1	1	460	500	137	593.9	4.086		#DIV/0!	1	2		1	1	60	2	2	2	161.404	175.439	-0.136364
9	43	8	1	1	2	2	2	1	1	2	2	2	2	2	2	40	1	96	2，2，0	2	1	1	420	450	84	353.9	2.43481	40.1	0.607185	2	2			1	31	2	2	2	147.368	157.895	0.0178571
9	44	5	1	2	2	2	2	2	1	2	1	2	2	2	2	39.429	1	24	1	1	1	1	430	450	100	494.4	3.40144		#DIV/0!	1	2				58	2	2	2	158.672	166.052	-0.178788
9	45	8	1	2	2	2	2	2	2	2	2	2	2	2	2	38.429	2	72	2,0,3	2	1	1	630	650	120	437.4	3.00929		#DIV/0!	2	2	278	2	2	75	2	2	2	176.471	182.073	-0.048
9	46	8	1	1	2	2	2	2	1	1	2	2	2	2	2	38.429	2	24	2,2，	2	1	1	440	450	97	450	3.09598	41.1	0.753279	1	2	186	1		65	2	2	2	156.028	159.574	-0.06
9	47	8	1	1	2	2	2	2	1	1	2	2	2	2	2	39.429	2	48	0	0	1	1	465	500	112	473.9	3.26041	41.6	0.783751	2	2		1	1	88	2	2	2	157.895	169.779	-0.0796875
9	48	6	1	1	2	2	2	2	2	2	2	2	2	2	2	41.856	2	24	1	1	1	1	420	450	80	426.2	2.93223	39.2	0.748019	1	2	247.1		2	62	2	2	2	126.888	135.952	-0.0542857
9	49	10	1	2	2	2	1	1	1	2	2	1	2	2	2	40.286	2	48	0	0	1	1	650	650	126	449.9	3.09529	40.1	0.771892	2	2	271.8	2		71	2	2	2	161.893	161.893	-0.0254854
9	50	9	1	1	2	2	2	1	1	2	2	2	2	2	2	39.143	2	24	1	1	1	1	470	500	90	385.7	2.65359	44	0.60309	1	2	371.9		1	65	2	2	2	167.26	177.936	-0.0786885
9	51	9	1	2	2	2	1	2	2	2	2	2	2	2	2	38.856	2	24	0	0	1	1	500	500	102	438.4	3.01617	41.5	0.726787	1	2	277	2	2	68	2	2	2	171.527	171.527	-0.0566343
9	52	4	1	1	2	2	2	1	1	2	2	2	2	2	2	37.286	1	28	1	1	1	1	540	550	110	490.3	3.37324		0.68	1	2	252.3			68	2	2	2	173.077	176.282	-0.121127
9	53	7	1	1	2	2	2	2	1	1	2	2	2	2	2	40.143	2	72	1	1	1	1	420	450	96	379.4	2.61025	34.4	0.758794	2	2				83	2	2	2	152.45	163.339	-0.0967213
9	54	9	1	2	2	2	1	2	1	1	2	2	2	2	2	37.856	2	72	2,3,0	2	1	1	500	500	95	349.8	2.4066		0.49	1	2	241	1		60	2	2	2	170.068	170.068	-0.0360656
10	1	1	2	2	2	2	2	1	1	2	2	2	2	2	2	41.286	2	48	7	3	1	2	480	500	84	690.1	4.74785	38.3	1.23965	2	2				23	2	2	2	135.211	140.845	-0.1125
10	2	13	1	1	2	2	2	1	1	2	2	1	2	2	2	39.429	1	45	2，0，0	1	1	1	550	550	104	396	2.72446	37.5	0.726522	1	2	265	1	2	63	2	2	2	171.875	171.875	-0.0588235
10	3	11	1	1	2	2	2	1	1	1	2	2	2	2	2	39.714	1	24	1	1	1	1	570	600	96	487.4	3.35329	33	1.01615	2	2	212		2	59	2	2	2	153.226	161.29	-0.07
10	4	7	1	1	2	2	2	1	1	2	2	2	2	2	2	41.286	1	10	0	0	1	1	650	650	145	286.2	1.96904	41.6	0.473327	1	2	184.9			76	2	2	2	166.667	166.667	-0.0394089
10	5	8	1	1	2	2	2	2	1	1	2	2	2	2	2	40.143	1	14	2，3，0	2	1	1	480	500	120	253.6	1.74475	40.1	0.435101	1	2	200			44	2	2	2	163.543	170.358	0.0672727
10	6	5	1	1	2	2	2	1	1	2	2	2	2	2	2	38	2	120	8	3	1	1	430	450	82	690.2	4.74854	38.7	1.22701	2	2	253.2		1	92	2	2	2	178.423	186.722	-0.090566
10	7	8	1	2	2	2	1	2	1	2	2	2	2	2	2	40.286	1	10	0	0	1	1	550	550	100	339.2	2.33368	38.5	0.60615	1	2				42	2	2	2	167.428	167.428	-0.019403
10	8	9	1	1	2	2	2	2	2	2	2	1	2	2	2	38.429	2	17	0	0	1	1	500	500	90	312.9	2.15273	36.4	0.591411	2	2	270			64	2	2	2	159.236	159.236	-0.0513595
10	9	12	1	1	2	2	2	2	1	2	2	2	2	2	2	40.571	1	36	0	0	1	1	530	550	93	427.4	2.94049	34	0.86485	1	2	427.4		2	68	2	2	2	144.809	150.273	0.00273973
10	10	9	1	1	2	2	2	2	2	2	2	2	2	2	2	41.143	2	10	0	0	1	1	580	600	145	305.8	2.10389	39.9	0.52729	1	2	232		2	68	2	2	2	151.436	156.658	-0.0303797
10	11	15	1	1	2	2	2	2	1	2	2	2	2	2	2	37.286	1	36	1,0,0	1	1	1	400	400	95	409.1	2.81459	40.5	0.694959	1	2	253		2	70	2	2	2	162.933	162.933	-0.0735849
10	12	11	1	1	2	2	2	2	1	2	2	2	2	2	2	40.429	1	48	1	1	1	1	680	700	120	418.3	2.87788	38.8	0.741722	1	2			2	71	2	2	2	178.947	184.211	0
10	13	5	1	2	2	2	1	1	2	2	2	2	2	2	2	38	2	4	1，0，0	1	1	1	580	600	109	613.9	4.2236	40.3	1.04804	1	2				74	2	2	2	158.254	163.711	-0.0291391
10	14	12	1	2	2	2	1	2	2	2	2	2	2	2	2	39.286	2	12	2	1	1	1	620	650	130	659.2	4.53526	39.3	1.15401	2	2	352	2	1	75	2	2	2	168.937	177.112	0.0381895
10	15	8	1	2	1	2	2	2	1	2	2	2	1	2	2	39.571	1	12	3，，0	1	1	1	480	500	110	586.1	4.03234	36.4	1.10778	2	2	265	2	2	41	1	2	2	169.611	176.678	-0.101587
10	16	11	1	1	2	2	2	2	2	2	2	2	2	2	2	40.286	2	24	0	0	1	1	530	550	113	396.3	2.72652	35.5	0.768034	1	2	249		2	63	2	2	2	174.917	181.518	-0.053125
10	17	6	1	1	2	2	2	2	2	2	2	1	2	2	2	40.286	1	21	0	0	1	1	620	650	136	254.7	1.75232	36.6	0.478776	1	2	148			46	2	2	2	172.462	180.807	-0.0190996
10	18	5	1	2	2	2	1	2	1	2	2	2	1	2	2	38.143	1	48	3，3，2	3	1	1	400	400	70	684.4	4.70863	33.7	1.39722	1	2	437	2		65	1	2	2	182.648	182.648	-0.0875
10	19	6	1	2	2	2	1	2	1	2	2	1	2	2	2	39.856	2	96	0	0	1	1	580	600	83	550.7	3.78879	40.1	0.944834	2	2		1	2	48	2	2	2	177.37	183.486	-0.0657143
10	20	7	1	1	2	2	2	1	1	2	2	2	2	2	2	41.429	2	48	2，3，3	3	1	1	510	540	96	718	4.9398	37	1.33508	1	2	439.9	2	2	77	2	2	2	170	180	-0.0625
10	21	14	1	1	2	2	2	2	2	1	2	2	2	2	2	40	1	24	2,2,3	3	1	1	380	400	67	508.8	3.50052	36.9	0.948649	1	2	222		2	41	2	2	2	155.102	163.265	-0.02
10	22	7	1	1	2	2	2	2	2	2	2	2	1	2	2	37	2	48	3，2，2	3	1	1	530	550	98	792.1	5.4496	41.1	1.32594	2	2	535			65	1	2	2	161.585	167.683	-0.113514
10	23	9	1	2	2	2	1	2	2	2	2	2	2	2	2	39.714	1	72	1,1,3	2	1	1	680	700	110	477.9	3.28793	37.4	0.879125	1	2			2	61	2	2	2	155.606	160.183	-0.0702128
10	24	10	1	1	2	2	2	1	1	2	2	2	2	2	2	39.714	1	2	0	0	1	1	750	750	130	672.3	4.62539	42.7	1.08323	1	2		1		66	2	2	2	170.455	170.455	0
10	25	10	1	1	2	2	2	2	2	2	2	1	2	2	2	39.286	1	40	0	0	1	1	490	500	110	474.3	3.26316	39.1	0.834567	1	2				92	2	2	2	164.983	168.35	0.00677966
10	26	10	1	2	2	2	1	1	2	2	2	2	2	2	2	39.714	1	48	2，，0	1	1	1	600	600	116	534.2	3.67527	36.7	1.00144	2	2		2	1	75	2	2	2	147.783	147.783	-0.0216867
10	27	12	1	1	2	2	2	1	2	2	2	2	2	2	2	39.143	1	7	1	1	1	1	660	700	137	345.1	2.37427	42.3	0.561293	1	2		1	2	61	2	2	2	167.939	178.117	-0.053012
10	28	14	1	1	2	2	2	2	2	2	2	1	2	2	2	40.571	1	15	0	0	1	1	480	500	100	427.3	2.9398	39.8	0.738643	1	2			2	64	2	2	2	168.421	175.439	-0.0172414
10	29	13	1	1	2	2	2	1	2	1	2	2	2	2	2	37	1	4	2，2，0	2	1	1	500	500	120	500.5	3.44341	44.7	0.770338	1	2			2	85	2	2	2	166.667	166.667	-0.0322581
10	30	9	1	1	2	2	2	1	2	1	2	1	2	2	2	38.856	1	47	0	0	1	1	490	500	87	557	3.83213	39.6	0.967709	1	2	228		2	57	2	2	2	159.091	162.338	-0.0375
10	31	5	1	2	2	2	1	1	2	2	2	2	2	2	2	39.571	1	24	2，0，3	2	1	1	550	550	90	442.2	3.04231	38.6	0.788164	1	2				68	2	2	2	161.765	161.765	-0.0555556
10	32	3	1	1	2	2	2	2	1	2	2	2	2	2	2	40.571	1	48	0	0	1	1	500	550	110	529.9	3.64568	43.2	0.843908	1	2				65	2	2	2	132.979	146.277	-0.0829268
10	33	7	1	1	2	2	2	2	2	2	2	2	2	2	2	40	2	12	0	0	1	1	430	450	85	361.5	2.4871	41.7	0.596427	1	2	263	2		64	2	2	2	186.957	195.652	-0.233333
10	34	5	1	1	2	2	2	1	1	2	2	2	2	2	2	40	2	24	0	0	1	1	480	500	120	447.5	3.07878	40.7	0.756456	2	2				70	2	2	2	143.713	149.701	-0.048433
10	35	6	1	1	2	2	2	1	2	2	2	2	2	2	2	40.429	1	24	0	0	1	1	460	500	108	434.5	2.98934	40.8	0.73268	2	2				46	2	2	2	133.527	145.138	-0.0295775
10	36	5	1	2	2	2	1	2	1	2	2	2	2	2	2	37	2	10	0	0	1	1	350	350	76	463.4	3.18817	41	0.777602	1	2				48	2	2	2	181.347	181.347	-0.0809524
10	37	13	1	2	2	2	1	1	2	2	2	1	2	2	2	39	2	19	1	1	1	1	470	500	115	253.6	1.74475	45.4	0.384307	1	2		1	2	46	2	2	2	175.047	186.22	0
10	38	5	1	1	2	2	2	2	2	2	2	2	2	2	2	38.714	1	24	0	0	1	1	510	550	108	544.1	3.74338	38.7	0.967281	1	2	278			65	2	2	2	154.545	166.667	0
10	39	8	1	1	2	2	2	1	2	2	2	2	2	2	2	40.429	1	1	2,2，	2	1	1	530	550	94	439	3.0203	35.7	0.846021	2	2		1		65	2	2	2	151.429	157.143	-0.0277778
10	40	4	1	1	2	2	2	1	1	2	2	2	2	2	2	37	1	24	0	0	1	1	600	650	109	573.8	3.94771	39.9	0.989402	2	2				64	2	2	2	164.384	178.082	-0.0394737
10	41	21	1	2	2	2	1	1	2	2	2	2	2	2	2	37	2	120	1	1	1	1	440	450	56	460	3.16477	42.9	0.73771	2	2		1	2	43	2	2	2	159.42	163.043	-0.0644068
10	42	10	1	1	2	2	2	2	2	2	2	2	2	2	2	37	1	48	2	1	1	1	430	450	95	526.6	3.62298	40.3	0.899002	2	2	225	2	2	79	2	2	2	159.851	167.286	-0.0218182
10	43	2	2	2	1	2	2	2	2	2	2	2	2	2	2	39.714	2	48	2,3,3	3	1	2	460	500	82	601	4.13485	33.6	1.23061	1	2	454.4				2	2	2	152.824	166.113	-0.0290323
10	44	8	1	1	2	2	2	1	2	2	2	1	2	2	2	37.714	1	0	2	1	1	1	380	400	72	306.7	2.11008	41.5	0.508453	1	2				60	2	2	2	149.606	157.48	-0.0928571
10	46	7	1	2	2	2	1	2	2	2	2	2	2	2	2	40	1	48	2	1	1	1	550	550	155	456.6	3.14138	38.9	0.807553	2	2	338	2	1	82	2	2	2	151.934	151.934	0.00555556
10	47	2	2	1	2	2	2	1	1	2	2	2	1	2	2	41	2	48	7	3	1	2	470	500	120	674.8	4.64259	41.1	1.12958	2	2	452				1	2	2	143.511	152.672	0.0234375
10	48	13	1	1	2	2	2	1	1	2	2	2	2	2	2	39.429	1	6	0	0	1	1	530	550	110	298.3	2.05229	39.6	0.518254	2	2	234	1	2	47	2	2	2	166.667	172.956	-0.0507463
10	49	9	1	1	2	2	2	2	1	2	2	2	2	2	2	40	2	24	0	0	1	1	520	550	132	387	2.66254	43.2	0.616328	2	2	294	1		67	2	2	2	153.619	162.482	-0.00441176
10	50	6	1	1	2	2	2	1	2	2	2	2	2	2	2	38.429	1	21	2	1	1	1	480	500	95	306	2.10526	43	0.489596	2	2				69	2	2	2	154.839	161.29	0
10	51	10	1	1	2	2	2	2	2	2	1	2	2	2	2	40.286	2	10	0	0	1	1	520	550	112	316.4	2.17681	40.9	0.532229	1	1		1	1	47	2	2	2	154.303	163.205	-0.0371429
10	52	12	1	2	1	2	2	2	2	2	2	2	2	2	2	39.429	2	20	0	0	1	1	530	550	101	441.5	3.0375	43.6	0.696673	2	2		2	2	78	2	2	2	164.596	170.807	-0.0242424
10	53	12	1	1	2	2	2	2	1	2	2	1	2	2	2	39.429	1	10	0	0	1	1	620	650	115	305.4	2.10114	38.4	0.547171	2	2		2	2	55	2	2	2	151.22	158.537	-0.0465116
10	54	12	1	1	2	2	2	1	1	2	2	2	2	2	2	40	1	48	0	0	1	1	580	600	135	446	3.06846	41.6	0.737609	2	2	266	1	1	54	2	2	2	151.042	156.25	-0.0278481
10	55	8	1	1	2	2	2	1	1	1	2	2	2	2	2	39.714	1	36	2，0，0	1	1	1	480	500	109	375.9	2.58617	43.2	0.598651	1	2		1	2	68	2	2	2	154.839	161.29	-0.0461538
10	56	10	1	1	2	2	2	1	2	2	2	2	2	2	2	40.429	1	72	1，0，0	1	1	1	430	450	120	432.3	2.9742	42.7	0.696534	2	2		1	2	67	2	2	2	155.235	162.455	-0.147692
10	57	7	1	1	2	2	2	1	1	2	2	3	1	2	2	40.856	2	25	3，2，3	3	1	1	450	450	84	414.1	2.84899	41.8	0.681575	1	2	237	1		69	1	2	2	171.103	171.103	-0.0640569
10	58	6	1	1	2	2	2	2	1	2	2	2	2	2	2	40.429	1	48	0	0	1	1	540	550	107	394.1	2.71139	38.7	0.700617	2	2		1	2	69	2	2	2	152.113	154.93	-0.0533333
10	59	8	1	1	2	2	2	1	2	2	2	2	1	2	2	38	2	48	3	1	1	1	530	550	113	494	3.39869	40.6	0.837116	1	2	335	1	1	44	1	2	2	166.667	172.956	-0.0647059
10	60	12	1	1	2	2	2	1	1	2	2	2	2	2	2	38.714	1	72	7	3	1	1	480	500	95	473.7	3.25903	37.8	0.862177	1	2		1		62	2	2	2	166.09	173.01	-0.124242
10	61	1	2	1	2	2	2	1	2	2	1	2	2	2	2	38.714	2	112	2，3，3	3	1	2	450	500	130	607.8	4.18163	41.2	1.01496	2	2					2	2	2	149.007	165.563	0.00666667
10	62	7	1	2	2	2	1	1	2	2	2	2	1	2	2	37.143	2	48	3，1	2	1	1	440	450	95	455.8	3.13588	39.5	0.793893	2	2	157.7	1	2	62	1	2	2	154.386	157.895	-0.05
10	63	13	1	1	2	2	2	1	1	1	2	2	2	2	2	38	2	48	2	1	2	1	480	500	120	534	3.67389	41.5	0.885275	1	1	410.6	1		84	2	2	2	147.692	153.846	-0.057971
10	66	5	1	1	2	2	2	2	1	2	2	2	2	2	2	40.856	2	5	0	0	1	1	460	500	106	316	2.17406	39.2	0.554608	2	2	191	2	2	65	2	2	2	150.82	163.934	-0.046875
10	67	1	2	2	2	1	2	2	2	2	2	2	2	2	2	41	2	96	8	3	1	2	360	360	85	765	5.26316	48.4	1.08743	2	2					2	2	2	128.571	128.571	-0.164179
10	68	10	1	1	2	2	2	2	2	2	1	1	2	2	2	38.429	1	38	0	0	2	1	380	400	95	536.3	3.68971	38.7	0.953415	2	2	385	1	2	161	2	2	2	149.02	156.863	-0.0892857
10	69	10	1	1	2	2	2	1	2	2	2	2	2	2	2	38	2	24	0，2，0	1	2	1	500	550	115	573.6	3.94634	36.1	1.09317	1	2	513.5		2	63	2	2	2	152.439	167.683	-0.0352941
10	70	8	1	2	2	2	1	2	2	2	2	2	2	2	2	40	2	24	1，0，0	1	1	1	550	550	139	445.9	3.06777		0.64	2	2	249.9	1	1	67	2	2	2	149.864	149.864	-0.0342105
10	71	5	1	1	2	2	2	2	2	2	2	2	2	2	2	37	1	2	2，2	2	1	1	470	500	120	584.2	4.01926	41	0.980308	2	2				82	2	2	2	164.912	175.439	0.0178571
10	72	6	1	1	2	2	2	1	2	2	2	2	2	2	2	39.714	2	21	1	1	1	1	450	500	115	409.9	2.82009	39.5	0.713947	1	2	300.6			58	2	2	2	162.455	180.505	-0.0280702
10	73	9	1	2	2	2	1	2	2	2	2	2	2	2	2	40	2	4	2，2，0	2	1	1	450	450	100	469.1	3.22738	45.4	0.710877	1	2	294		2	93	2	2	2	141.956	141.956	-0.107042
10	74	10	1	1	2	2	2	2	2	2	2	1	2	2	2	37	1	96	2	1	1	1	480	500	180	415.8	2.86068	37.4	0.764888	2	2			1	60	2	2	2	166.957	173.913	-0.154412
10	75	14	1	1	2	2	2	2	2	2	2	2	2	2	2	37.143	1	24	2	1	1	1	690	700	126	489.3	3.36636	38.8	0.867618	2	2		1	1	62	2	2	2	156.818	159.091	-0.0736842
10	76	4	1	1	2	2	2	2	2	2	2	2	2	2	2	39.286	2	24	2	1	1	1	530	550	110	555.9	3.82456	45.1	0.848018	1	2				61	2	2	2	164.341	170.543	-0.0798859
10	77	10	1	1	2	2	2	1	2	2	2	2	2	2	2	40.714	2	10	0	0	1	1	630	650	113	449	3.0891	38.6	0.800284	2	2	272.2		2	73	2	2	2	176.966	182.584	-0.0871795
10	78	12	1	1	2	2	2	2	2	2	2	2	2	2	2	38.429	2	30	2，0，2	2	1	1	530	550	115	460	3.16477	40.6	0.779501	2	2	251	1	2	87	2	2	2	162.08	168.196	-0.0521739
10	79	8	1	2	2	2	1	1	1	2	2	2	2	2	2	40.429	1	48	2，2，0	2	1	1	630	650	115	536.2	3.68903	38.8	0.95078	2	2	375.3			65	2	2	2	160.714	165.816	-0.0776471
10	80	11	1	1	2	2	2	2	2	2	2	2	2	2	2	37.143	1	24	2，2，3	3	1	1	320	350	73	531.8	3.65875	39.6	0.923928	2	2	249	1	2	67	2	2	2	147.465	161.29	-0.132
10	81	11	1	2	2	2	1	1	2	2	2	2	2	2	2	38.571	1	29	0	0	1	1	420	450	120	409.6	2.81803	38.6	0.730058	1	2	340		2	118	2	2	2	137.931	147.783	-0.00163934
11	2	7	1	1	2	2	2	1	1	2	2	2	2	2	2	37.856	1	30	0	0	1	1	460	500	102	541.5	3.72549	37.6	0.990822	1	2			1	79	2	2	2	148.387	161.29	-0.0882353
10	82	4	1	2	2	2	1	1	1	2	2	2	2	2	2	41.714	1	48	0	0	1	1	510	550	106	513.7	3.53423	39.5	0.894741	1	2	254			41	2	2	2	151.786	163.69	-0.0117647
11	1	7	1	1	2	2	2	1	1	2	2	2	2	2	2	40.286	1	48	0	0	1	1	480	500	85	508.7	3.49983	35.6	0.983098	1	2				65	2	2	2	145.675	151.745	-0.071831
11	3	9	1	2	2	2	1	2	2	2	2	2	2	2	2	40.143	1	48	0	0	1	1	590	600	145	436.4	3.00241	39.7	0.756274	1	1				67	2	2	2	165.035	167.832	-0.0833333
11	4	1	2	2	1	2	2	2	2	2	2	2	2	2	2	37	2	22	1	1	1	2	580	600	120	352.2	2.42312	41.7	0.581083	2	2					2	2	2	170.088	175.953	-0.0257143
11	5	9	1	1	2	2	2	2	2	2	2	2	2	2	2	40.286	2	24	2,2	2	1	1	550	600	120	620	4.26557	40.3	1.05845	1	2			2	53	2	2	2	161.765	176.471	-0.0810811
11	6	10	1	1	2	2	2	2	2	2	2	2	2	2	2	41.571	2	3	0	0	1	1	500	500	97	489	3.36429	42.3	0.795341	1	2				50	2	2	2	181.818	181.818	-0.0517241
11	7	10	1	1	2	2	2	2	1	2	2	2	2	2	2	41.856	2	48	0	0	1	1	550	550	115	438.6	3.01754	40.3	0.74877	2	2			2	62	2	2	2	171.875	171.875	-0.0857143
11	8	9	1	1	2	2	2	2	1	1	1	2	2	2	2	38.429	1	17	0	0	1	1	550	600	128	346	2.38046	42.2	0.56409	2	2			2	85	2	2	2	168.712	184.049	-0.0411765
11	9	9	1	1	2	2	2	2	2	2	2	2	2	2	2	38.286	1	24	2	1	1	1	600	600	106	456.9	3.14345	38	0.827223	1	2				89	2	2	2	174.927	174.927	-0.02
11	10	7	1	1	2	2	2	2	2	2	2	2	2	2	2	40.429	2	29	2	1	1	1	510	550	150	478.2	3.28999	43.9	0.749428	2	2				69	2	2	2	157.407	169.753	-0.0470588
11	11	5	1	1	2	2	2	2	2	2	2	2	2	2	2	38.429	1	48	0	0	1	1	480	500	75	386.7	2.66047	40.6	0.655289	1	2				68	2	2	2	165.517	172.414	-0.09375
11	12	14	1	1	2	2	2	2	2	2	2	2	2	2	2	37.571	2	48	1	1	1	1	540	550	100	460	3.16477		#DIV/0!	2	2			1	38	2	2	2	164.134	167.173	-0.0030303
11	13	4	1	2	2	2	1	2	2	2	2	2	2	2	2	38.429	1	48	0	0	1	1	530	550	103	493.6	3.39594		#DIV/0!	2	2				86	2	2	2	142.091	147.453	-0.0435897
11	14	12	1	2	2	2	1	1	2	2	2	2	2	2	2	40	1	36	0	0	1	1	550	550	85	440.1	3.02786	39.6	0.764612	1	1				88	2	2	2	162.722	162.722	-0.0478873
11	15	7	1	1	2	2	2	2	1	2	2	2	2	2	2	37	1	48	0	0	1	1	560	600	120	427	2.93774	41	0.716521	2	2				62	2	2	2	149.533	160.214	-0.0753086
11	16	13	1	1	2	2	2	2	2	2	2	2	2	2	2	39.286	1	24	0	0	1	1	540	550	103	428.8	2.95012		0.66	1	2			2	65	2	2	2	163.636	166.667	-0.108108
11	17	11	1	2	2	2	1	2	2	2	2	2	2	2	2	38.429	2	48	0	0	1	1	400	400	85	519.6	3.57482		#DIV/0!	1	2				65	2	2	2	136.752	136.752	-0.0564516
11	18	3	2	1	2	2	2	1	2	2	2	2	2	2	2	40.429	1	24	2	1	1	2	480	500	110	404.2	2.78087	39.6	0.702241	1	2					2	2	2	147.239	153.374	-0.0550725
11	19	10	1	1	2	2	2	2	2	2	2	2	2	2	2	40.571	2	20	1	1	1	1	550	600	110	548.9	3.7764	42	0.899143	1	2			2	39	2	2	2	141.57	154.44	-0.117045
11	20	14	1	2	2	2	1	2	2	2	2	2	2	2	2	39.856	2	120	0	0	1	1	350	350	90	406.9	2.79945	36.6	0.764877	1	2			2	68	2	2	2	163.17	163.17	0.0463415
11	21	4	1	1	2	2	2	1	2	2	2	2	2	2	2	39.143	1	48	0	0	1	1	600	600	175	381.7	2.62607	38.5	0.682097	1	2				57	2	2	2	170.455	170.455	-0.0486486
11	22	6	1	1	2	2	2	1	2	2	2	2	2	2	2	38.429	1	48	2,1,3	2	1	1	520	550	79	422.5	2.90678	38.8	0.749169	2	2				75	2	2	2	158.537	167.683	-0.10137
11	23	13	1	2	2	2	1	2	2	2	2	2	2	2	2	39.429	2	60	2	1	1	1	500	500	95	570.2	3.92294	38.7	1.01368	2	2			2	70	2	2	2	163.934	163.934	-0.046875
11	24	6	1	1	2	2	2	1	2	2	2	2	2	2	2	38.286	1	48	2,0,3	2	1	1	480	500	105	560.3	3.85483		#DIV/0!	2	2		2		81	2	2	2	170.213	177.305	-0.11875
11	25	5	1	1	2	2	2	2	2	2	2	2	2	2	2	39	2	8	0	0	1	1	470	500	100	547.2	3.76471	40.9	0.920466	2	2				62	2	2	2	144.393	153.61	0.0333333
11	26	8	1	2	1	2	2	2	2	2	2	2	2	2	2	39	1	22	2,0,3	2	1	1	600	600	148	528.6	3.63674	34.6	1.05108	2	2		2		90	2	2	2	161.29	161.29	-0.07
11	27	10	1	2	2	2	1	2	2	2	2	2	2	2	2	37.571	1	3	2	1	1	1	430	500	120	473.1	3.2549	40.1	0.811696	2	2		1	2	109	2	2	2	147.009	170.94	-0.0564516
11	28	7	1	1	2	2	2	2	2	2	2	2	2	2	2	39.571	1	72	2,3，	2	1	1	480	500	90	421.1	2.89714	39	0.742858	1	2		1	2	66	2	2	2	171.429	178.571	-0.0344828
11	29	4	1	1	2	2	2	2	2	1	2	2	2	2	2	40.286	2	12	0	0	1	1	600	600	120	470.2	3.23495	38.5	0.840247	1	2				49	2	2	2	169.492	169.492	0.0114286
11	30	5	1	2	2	2	2	2	2	2	2	2	2	2	2	38.429	1	48	1,2,3	2	1	1	470	500	107	549.6	3.78122	34.9	1.08344	2	2				62	2	2	2	162.069	172.414	-0.0645161
11	31	7	1	2	2	2	1	1	1	1	2	2	2	2	2	41.571	1	96	0	0	1	1	550	550	138	462.7	3.18335	43.1	0.738596	1	2				62	2	2	2	161.765	161.765	-0.0933333
11	32	17	1	1	2	2	2	1	2	2	2	2	2	2	2	39.429	1	48	0	0	1	1	490	500	110	450.1	3.09666	41	0.755284	1	2			1	73	2	2	2	136.111	138.889	-0.0526316
11	33	10	1	1	2	2	2	2	2	1	2	1	2	2	2	39	1	48	0	0	1	1	340	350	85	428.3	2.94668	41.8	0.704947	1	2		1		33	2	2	2	152.466	156.951	-0.0708333
11	34	8	1	2	2	1	2	2	2	1	2	1	2	2	2	38.286	1	29	1	1	2	1	670	700	142	731.9	5.03543	43.7	1.15227	1	2				137	2	2	2	142.553	148.936	-0.0208333
11	35	18	1	1	2	2	2	1	1	1	2	2	2	2	2	38.857	1	48	2,0,3	2	1	1	320	350	70	508.5	3.49845	36.2	0.966423	2	2		2	2	89	2	2	2	156.098	170.732	-0.240741
11	36	8	1	2	2	2	1	2	2	2	2	2	2	2	2	38.143	2	48	2,2,3	3	1	1	440	450	90	532.5	3.66357	39.6	0.925144	1	2			1	96	2	2	2	169.231	173.077	-0.103448
11	37	12	1	1	2	2	2	1	2	2	2	2	2	2	2	40.857	2	24	0	0	1	1	530	550	103	501.3	3.44892	42.5	0.81151	1	2			2	93	2	2	2	178.451	185.185	-0.1
11	38	2	2	2	2	2	1	2	1	2	2	2	2	1	2	38	2	28	2,3,3	3	1	2	600	600	120	657.3	4.52219	39.2	1.15362	1	2					2	1	2	181.818	181.818	-0.0704225
11	39	9	1	2	1	2	2	2	2	2	2	2	1	2	2	40	2	24	2	1	1	1	600	600	120	464.8	3.1978	32.8	0.974939	1	1		2	1	79	1	2	2	174.927	174.927	-0.02
11	40	9	1	1	2	2	2	2	2	2	2	2	2	2	2	39	2	48	0	0	1	1	490	500	76	513.8	3.53492	34.3	1.03059	2	2			2	65	2	2	2	148.036	151.057	-0.0542857
11	41	14	1	2	2	2	2	2	2	1	1	2	2	2	2	39.286	1	24	1	1	1	1	430	450	70	375	2.57998		0.59	1	2			2	60	2	2	2	158.088	165.441	-0.045614
11	42	5	1	2	2	2	1	2	2	2	2	2	2	2	2	37.429	1	96	0	0	1	1	540	550	113	430.6	2.9625	41.5	0.713856	2	2				40	2	2	2	168.224	171.34	-0.0695652
11	43	13	1	1	2	2	2	2	2	2	2	2	2	2	2	39.856	1	24	1	1	1	1	480	500	101	361.7	2.48848	37.5	0.663594	1	2			1	42	2	2	2	153.355	159.744	-0.0656716
11	44	6	1	1	2	2	2	1	2	2	2	2	2	2	2	39.571	1	50	2,1	1	1	1	500	500	94	503.3	3.46268	42.8	0.809037	2	2			2	39	2	2	2	153.846	153.846	-0.0151515
11	45	9	1	1	2	2	2	2	2	2	2	2	2	2	2	40	2	36	0	0	1	1	470	500	88	465.7	3.20399	37.2	0.861288	2	2			2	44	2	2	2	151.613	161.29	0
11	46	4	1	1	2	2	2	1	1	2	2	2	2	2	2	40.286	1	24	2,2，2，	2	1	1	390	400	78	357	2.45614	41.3	0.594707	1	2				48	2	2	2	157.895	161.943	-0.0851852
11	47	2	2	2	2	2	1	1	2	2	2	2	2	2	2	37.286	2	4	2,2	2	1	2	400	400	100	483.4	3.32577	41.7	0.797546	2	2					2	2	2	167.715	167.715	-0.0647059
11	48	11	1	2	2	2	2	2	2	2	2	2	1	2	2	40	2	48	3,2，3	3	1	1	580	600	120	374.9	2.57929	41	0.629095	1	2				158	1	2	2	156.757	162.162	-0.159091
11	49	13	1	2	2	2	1	2	2	2	2	2	2	2	2	38	1	72	0	0	1	1	440	450	96	497.3	3.4214	36.5	0.937369	1	2				74	2	2	2	159.42	163.043	-0.109677
11	50	10	1	1	2	2	2	2	1	2	2	2	2	2	2	37.571	1	22	1	1	1	1	350	350	60	389.9	2.68249	38.2	0.702223	2	2				44	2	2	2	172.414	172.414	-0.0772727
11	51	9	1	1	2	2	2	2	2	2	2	2	2	2	2	37.571	1	30	1	1	1	1	430	450	91	436.4	3.00241	38.4	0.781877	2	2				65	2	2	2	161.049	168.539	-0.0949153
11	52	12	1	1	2	2	2	2	2	2	2	2	2	2	2	40.571	1	24	1,2	1	1	1	480	500	115	390.4	2.68593	37.1	0.72397	2	2			2	70	2	2	2	152.381	158.73	-0.0789474
11	53	6	1	1	2	2	2	2	2	2	2	2	2	2	2	39	1	24	2,2，,3	3	1	1	490	500	95	605.7	4.16718	41.9	0.994554	2	2			2	58	2	2	2	163.062	166.389	-0.141429
11	54	4	1	2	2	2	1	2	2	2	2	2	2	2	2	39.143	2	48	2,3	2	1	1	500	500	109	440.5	3.03062	38.1	0.795437	1	2				69	2	2	2	161.29	161.29	-0.114286
11	55	7	1	1	2	2	2	2	2	2	2	2	2	2	2	39.571	1	48	1	1	1	1	550	600	97	470.3	3.23564	39	0.829651	1	2				89	2	2	2	154.93	169.014	-0.0657895
11	56	12	1	2	1	2	2	2	2	2	2	2	2	2	2	40	1	24	1,2，3	2	1	1	420	450	129	525	3.61197	36.8	0.981514	2	2		2	2	102	2	2	2	147.368	157.895	-0.05
11	57	14	1	1	2	2	2	1	2	2	2	2	2	2	2	38.714	1	10	0	0	1	1	540	550	128	432.8	2.97764		#DIV/0!	1	2		1	1	69	2	2	2	151.685	154.494	-0.0111111
11	59	16	1	2	1	2	2	2	2	2	2	2	2	2	2	38.714	2	1	2,2,3	3	1	1	470	500	120	475	3.26797	37.1	0.880855	2	2			1	116	2	2	2	162.069	172.414	-0.194444
11	60	11	1	1	2	2	2	2	2	2	2	2	2	2	2	40.143	1	1	2	1	1	1	460	500	102	494.7	3.40351	36.9	0.92236	2	2			2	72	2	2	2	155.405	168.919	-0.0451613
11	61	7	1	1	2	2	2	2	2	2	2	2	2	2	2	38.571	2	27	2,0,3	2	1	1	440	450	110	471.1	3.24114	40	0.810286	1	2				65	2	2	2	160	163.636	-0.0833333
11	62	6	1	1	2	2	2	2	2	2	2	2	2	2	2	40.429	1	10	0	0	1	1	430	450	105	414.1	2.84899	38.4	0.741923	1	2				47	2	2	2	166.667	174.419	-0.0444444
11	63	7	1	1	2	2	2	2	2	1	2	2	2	2	2	38.856	2	29	2	1	1	1	370	400	120	653.4	4.49536	41.7	1.07802	1	2				114	2	2	2	160.87	173.913	-0.08
11	64	11	1	1	2	2	2	2	2	2	2	2	2	2	2	39.286	2	24	2	1	1	1	530	550	120	583.1	4.0117	36.2	1.1082	1	2		1	2	65	2	2	2	153.846	159.652	-0.116667
11	65	6	1	1	2	2	2	1	2	2	2	2	2	2	2	38.714	1	15	2,0,3	2	1	1	480	500	105	501	3.44685	37.3	0.924089	2	2				76	2	2	2	170.213	177.305	-0.201133
11	66	13	1	1	2	2	2	1	2	2	2	2	2	2	2	39	1	24	2,0,3	2	1	1	350	350	69	382.7	2.63295	35.6	0.739594	1	2				48	2	2	2	154.867	154.867	-0.096
11	67	5	1	1	2	2	2	2	2	2	2	2	2	2	2	39	1	18	2	1	1	1	230	330	55	299.5	2.06054	36.6	0.56299	2	2		2		68	2	2	2	63.0137	90.411	0.0138889
11	68	16	1	1	2	2	2	2	2	2	2	2	2	2	2	39	1	48	1	1	1	1	480	500	138	473.2	3.25559	42.6	0.764223	1	2		1	1	58	2	2	2	160	166.667	-0.047619
11	69	5	1	1	2	2	2	2	2	2	2	2	2	2	2	40.286	2	12	2,2,3	3	1	1	500	500	110	349.4	2.40385	36.5	0.65859	1	2				35	2	2	2	174.216	174.216	-0.0433333
11	70	13	1	2	2	2	1	2	2	2	2	2	2	2	2	38	2	48	1	1	1	1	550	550	135	484.2	3.33127	33.5	0.994409	1	2			2	92	2	2	2	163.69	163.69	0.0181818
11	71	6	1	1	2	2	2	1	2	2	2	2	2	2	2	41	1	24	0	0	1	1	550	550	145	499.9	3.43928	37.7	0.912277	2	2				96	2	2	2	171.34	171.34	-0.0272727
11	72	11	1	1	2	2	2	2	2	2	2	2	2	2	2	38	1	24	2	1	1	1	500	500	129	527	3.62573	36.3	0.998824	1	2		2	2	65	2	2	2	166.667	166.667	-0.025974
11	73	20	1	1	2	2	2	1	1	2	1	2	2	2	2	37.856	2	24	3,3,3	3	1	1	380	400	90	690.8	4.75267	42.7	1.11304	1	2		2	2	69	2	2	2	150.198	158.103	-0.0964286
11	74	8	1	1	2	2	2	2	2	2	2	2	2	2	2	37.413	1	24	2	1	1	1	540	550	115	423.6	2.91434	37.6	0.775092	2	2		1		72	2	2	2	181.818	185.185	-0.1
11	75	10	1	2	2	2	1	1	2	2	2	2	2	2	2	38.413	1	48	2	1	1	1	640	650	133	643.1	4.42449	35	1.26414	1	1			2	69	2	2	2	161.616	164.141	0.00253165
11	76	5	1	1	2	2	2	1	1	2	2	2	2	2	2	40	1	24	2	1	1	1	580	600	105	408.2	2.80839		#DIV/0!	1	2				57	2	2	2	163.38	169.014	-0.0533333
11	77	6	1	2	2	2	1	1	1	2	2	2	2	2	2	37.143	2	20	0	0	1	1	390	360	95	247.9	1.70554	35.2	0.484528	2	2				65	2	2	2	175.676	162.162	-0.0553191
11	78	9	1	1	2	2	2	2	2	2	2	2	2	2	2	40	2	24	0	0	1	1	500	500	110	481.6	3.31338	39.7	0.834605	1	2				80	2	2	2	155.763	155.763	-0.0272727
11	79	7	1	1	2	2	2	2	1	2	2	2	2	2	2	37.413	2	48	0	0	1	1	600	600	120	471.4	3.24321	34.6	0.937343	2	2			2	83	2	2	2	165.517	165.517	0.0820896
11	80	12	1	1	2	2	2	1	2	2	2	2	2	2	2	38.413	1	24	1	1	1	1	500	500	85	473.4	3.25697		0.76	2	2			1	72	2	2	2	186.567	186.567	-0.106667
11	81	10	1	1	2	2	2	1	2	2	1	1	2	2	2	40	1	41	1,2	1	1	1	470	500	225	476.9	3.28105		0.82	1	1		1		50	2	2	2	145.963	155.28	-0.0666667
11	82	11	1	1	2	2	2	2	2	2	2	2	2	2	2	39.714	1	72	2,2,3	3	1	1	660	700	185	456	3.13725	31.1	1.00876	2	2		2		89	2	2	2	154.93	164.319	0.00235294
11	83	13	1	1	2	2	2	2	2	2	2	2	2	2	2	40.286	2	4	2,2，3	3	1	1	440	450	93	411	2.82766	40.2	0.703397	1	2				42	2	2	2	179.592	183.673	0
11	84	9	1	1	2	2	2	2	2	2	2	2	2	2	2	40.143	2	24	2	1	1	1	500	500	77	400.1	2.75267	39.8	0.691625	2	2			2	51	2	2	2	134.048	134.048	-0.0675
11	86	8	1	1	2	2	2	2	1	2	2	2	2	2	2	37	2	24	1	1	1	1	480	500	106	659.3	4.53595		1.1	2	2			2	48	2	2	2	172.662	179.856	-0.0733333
11	87	10	1	2	2	2	2	2	2	2	2	2	2	2	2	40.143	2	96	2	1	1	1	490	500	100	481.1	3.30994	39.2	0.844373	2	2		1		41	2	2	2	160.131	163.399	-0.0727273
11	88	11	1	1	2	2	2	2	2	2	2	2	2	2	2	37	1	24	0	0	1	1	600	600	130	529.1	3.64018	41.2	0.883539	1	2		1	2	68	2	2	2	166.667	166.667	-0.0769231
11	89	5	1	1	2	2	2	1	1	2	2	2	2	2	2	40.286	1	72	0	0	1	1	520	550	112	601	4.13485	38.7	1.06844	2	2				113	2	2	2	172.185	182.119	-0.0707692
11	90	6	1	1	2	2	2	2	1	2	2	2	2	2	2	39.714	2	8	0	0	1	1	420	450	60	349.1	2.40179	35.2	0.682326	2	2			2	69	2	2	2	152.174	163.043	-0.0142857
11	91	10	1	1	2	2	2	1	1	2	2	2	2	2	2	40.143	1	48	2,3	2	1	1	600	600	92	451.5	3.1063	38.6	0.80474	2	2			2	63	2	2	2	174.419	174.419	-0.0702703
11	92	7	1	1	2	2	2	2	2	2	2	2	2	2	2	37	1	24	0	0	1	1	470	500	125	361.6	2.48779	38.2	0.651253	2	2			2	40	2	2	2	149.206	158.73	0
11	93	10	1	1	2	2	2	2	2	2	2	2	2	2	2	38.571	2	72	2,3	2	1	1	450	450	80	589.8	4.05779	38.6	1.05124	2	2				47	2	2	2	170.455	170.455	-0.0896552
11	94	10	1	1	2	2	2	2	1	2	2	2	2	2	2	40.286	1	48	0	0	1	1	380	400	82	472.9	3.25353	36.2	0.898764	2	2	261.3	1	1	85	2	2	2	154.472	162.602	-0.016
11	95	5	1	1	2	2	2	2	2	2	2	2	2	2	2	39.413	2	24	2,1，	1	1	1	600	600	120	637.3	4.38459	40.3	1.08799	1	2				65	2	2	2	179.104	179.104	-0.0896739
11	96	5	1	1	2	2	2	2	2	2	2	2	2	2	2	38.413	1	24	1	1	1	1	460	500	90	445.9	3.06777	35	0.876505	2	2			2	38	2	2	2	153.846	167.224	-0.120588
11	97	7	1	1	2	2	2	1	2	2	2	2	2	2	2	39.413	1	28	0	0	1	1	470	500	100	354	2.4355		0.56	1	2				45	2	2	2	160.959	171.233	-0.0730159
11	99	6	1	1	2	2	2	1	2	2	2	2	2	2	2	38.856	1	24	2	1	1	1	520	550	94	477.7	3.28655	35.1	0.936339	2	2		1		57	2	2	2	156.627	165.663	-0.0647887
11	100	7	1	1	2	2	2	2	2	2	2	2	2	2	2	41.286	2	48	1	1	1	1	650	650	115	501.6	3.45098		1.06	2	2			2	43	2	2	2	165.816	165.816	-0.02
11	101	10	1	2	1	2	2	2	2	2	2	2	2	2	2	37	2	16	1	1	1	1	500	550	110	435.6	2.9969	34.5	0.868668	2	2	276.9	1		69	2	2	2	145.349	159.884	0.0117647
11	102	8	1	2	2	2	1	2	2	2	2	2	2	2	2	39.143	2	48	1	1	1	1	500	500	70	421.2	2.89783	37	0.783198	2	2				64	2	2	2	158.228	158.228	-0.0125
11	103	11	1	1	2	2	2	1	1	2	2	2	2	2	2	40.286	2	24	0	0	1	1	600	600	117	452.3	3.1118	35.3	0.881529	1	2			2	58	2	2	2	169.972	169.972	-0.0459459
11	104	11	1	2	2	2	1	1	2	2	2	2	2	2	2	39.429	1	48	2	1	2	1	450	450	75	514.2	3.53767	35.5	0.996526	1	2			1	62	2	2	2	180	180	-0.122807
11	105	18	1	1	2	2	2	2	1	2	2	2	2	2	2	39.856	2	26	0	0	1	1	380	400	83	361.2	2.48504	41.4	0.60025	2	2			2	37	2	2	2	169.643	178.571	-0.0666667
11	106	7	1	1	2	2	2	2	2	2	2	2	1	2	2	38.286	1	20	3,0,3	2	1	1	330	330	51	249.2	1.71448	33.3	0.51486	2	2		1		47	1	2	2	97.0588	97.0588	0.114754
11	107	8	1	1	2	2	2	1	2	2	2	2	2	2	2	39.429	2	23	2	1	1	1	520	550	97	420.8	2.89508	39.5	0.732932	1	2		1		45	2	2	2	173.333	183.333	-0.0625
11	108	11	1	2	1	2	2	2	2	1	2	2	2	2	2	37.143	1	3	4	2	1	1	420	450	118	198.4	1.36498	35.7	0.382348	2	2	199.1	2		111	2	2	2	178.723	191.489	-0.0289256
11	109	4	2	2	1	2	2	2	1	2	2	2	2	2	2	37.143	1	15	1	1	1	2	470	470	95	259.4	1.78466	42.4	0.42091	1	2	294.7			35	2	2	2	177.358	177.358	-0.0535714
11	110	9	1	1	2	2	2	2	1	2	2	2	2	2	2	41	2	15	0	0	1	1	450	450	88	414.4	2.85105	36.5	0.781109	1	2	268.4			63	2	2	2	147.059	147.059	-0.0727273
11	111	8	1	1	2	2	2	2	1	2	2	2	2	2	2	24	2	48	1	1	1	1	430	450	110	556	3.82525	35.7	1.0715	1	2	393.3			67	2	2	2	142.384	149.007	-0.0351438
11	112	6	1	2	2	2	1	1	2	2	2	2	2	2	2	40.429	1	48	0	0	1	1	580	600	180	427.6	2.94186	36.6	0.803788	1	2	166.2		2	61	2	2	2	165.714	171.429	0
11	113	7	1	1	2	2	2	2	2	2	2	2	2	2	2	37	1	23	2	1	1	1	530	550	109	427.9	2.94393	35.2	0.836343	1	2	258.3			56	2	2	2	168.79	175.159	-0.102857
11	114	6	1	1	2	2	2	2	2	1	2	2	2	2	2	39.714	2	20	2	1	1	1	520	550	90	314	2.1603	36.5	0.0475733	1	2				49	2	2	2	160.991	170.279	-0.05
